# Supplementary material for: Synchrotron radiation macromolecular crystallography: science and spin-offs
Source: PubMed Central journal article supplement (PMC4392420; doi:10.1107/s205225251402795x), 2015-02-03

# IUCrJ

**Volume 2 (2015)**

**Supporting information for article:**

**Synchrotron radiation macromolecular crystallography: our  
science and spin offs**

**John R. Helliwell and Edward P. Mitchell**

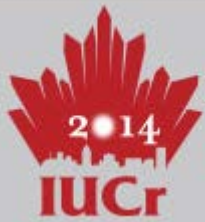

## *IUCr Montreal Congress Keynote Lecture August 6<sup>th</sup> 2014*

### *Synchrotron radiation macromolecular crystallography: our science and some spin offs*

*John R Helliwell*

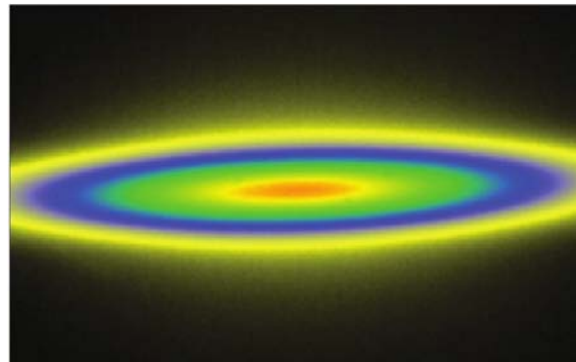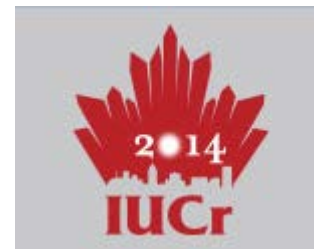

# Contents

- *Canadian Light Source MX*
- *Historical aspects: obviously a somewhat personal selection*
- *Our science applications*
- *Current & future beamline developments*
- *New X-ray sources*
  - *the national 3<sup>rd</sup> generation sources;*
  - *the ultimate storage rings;*
  - *the X-ray lasers*
- *Some spin offs*
  - *SR commercial usage; SR chemical crystallography ; neutron MX;*
  - *an example of the Public impact of SR and structural science*

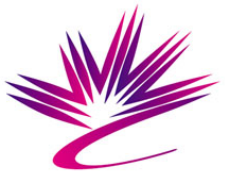

Canadian Centre canadien  
Light de rayonnement  
Source synchrotron

# Canadian Light Source MX

## A frontier national infra structure

**The Canadian MX Facility has ID and BM beamlines & supports over 60 labs.**

|                                                                 | CMCF-ID Current                                                                                       | CMCF-ID Proposed                                                              |
|-----------------------------------------------------------------|-------------------------------------------------------------------------------------------------------|-------------------------------------------------------------------------------|
| Spectral range (keV)/(Å)                                        | 6.0 - 18.0 /(2.1 - 0.7)                                                                               | 5.0 - 22.0 /(2.5 - 0.6)                                                       |
| $\Delta E/E$ Si(111) @12 keV                                    | $1.5 \times 10^{-4}$                                                                                  | $1.5 \times 10^{-4}$                                                          |
| Focal size @ 12 keV (FWHM) ( $\mu\text{m} \times \mu\text{m}$ ) | 150 (H) x 30 (V)                                                                                      | 50 (H) x 5 (V)                                                                |
| Flux on the sample @ 12 keV (photons/s)                         | $5 \times 10^{12}$<br>$1 \times 10^{12}$ (50 $\mu\text{m}$ )<br>$2 \times 10^{10}$ (5 $\mu\text{m}$ ) | $>10^{13}$<br>$>10^{13}$ (50 $\mu\text{m}$ )<br>$>10^{11}$ (5 $\mu\text{m}$ ) |
| Typical beam size ( $\mu\text{m}$ )                             | 50                                                                                                    | 20                                                                            |

CLS Layout  
Linac - LTB1  
BR1 - BTS1  
SR1  
Shielding

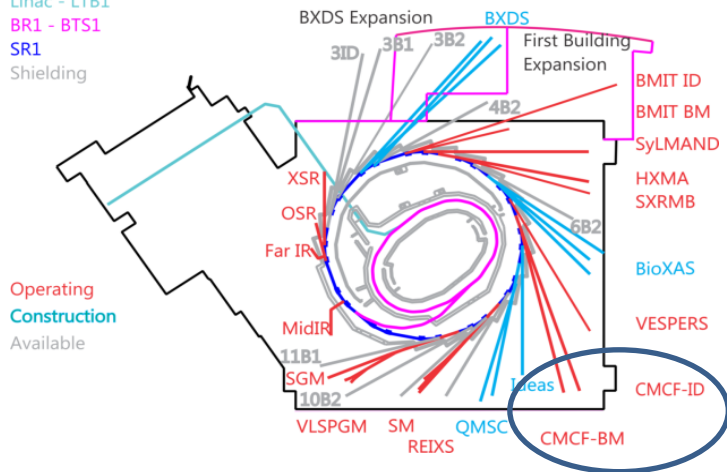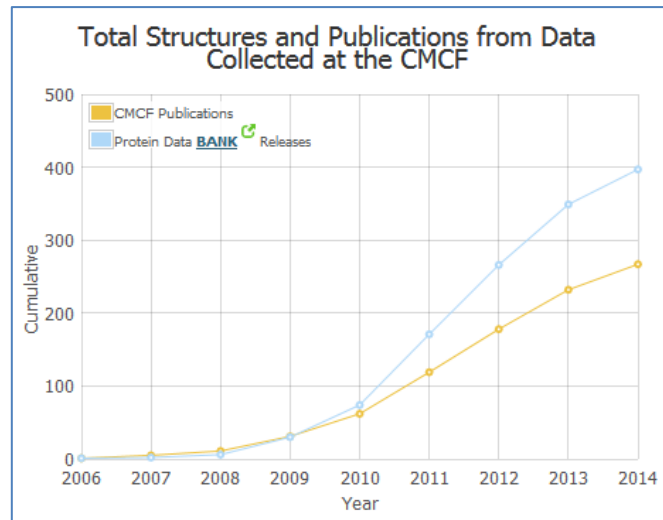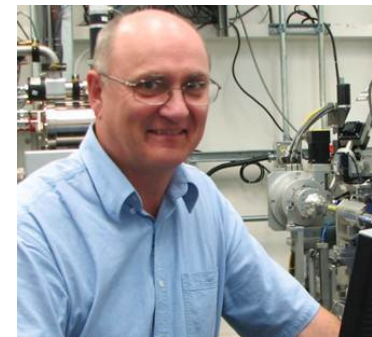

**CLS MX Leader  
Pawel Grochulski**

**JRH visit to CLS 2002**

<http://cmcf.lightsource.ca>

***How did we arrive at this excellence?:***

***Historical aspects (& obviously a somewhat  
personal selection)***

# Challenges in the mid 1970s

- Weak diffraction and long exposure times in the home lab for MX
- Solving the crystallographic phase problem was haphazard
- I heard **Mössbauer** in his lecture at RAL suggest the use of nuclear anomalous dispersion
- The IUCr book Anomalous scattering was just published in 1975
- It was a fertile time for a physicist like me entering protein crystallography (although at my interview one person said “don’t bother, all the methods are fine as they are”)
- First MX expts at SSRL mid 1970s were led by **Keith Hodgson**; I found the preprint\* on this very exciting!

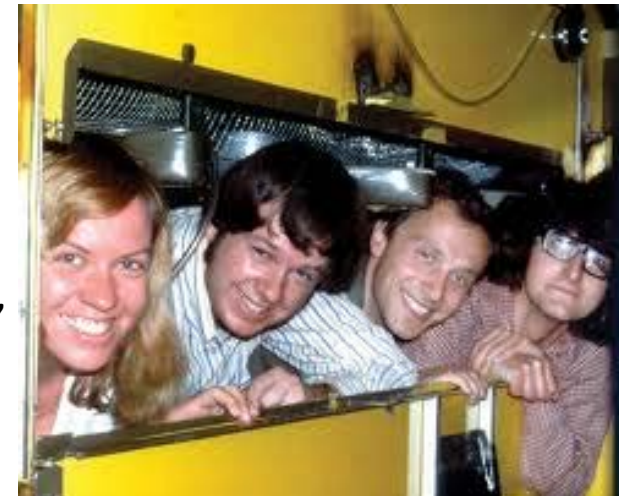

\* Phillips, J. C., Wlodawer, A., Yevitz, M. M. and Hodgson, K. O. (1976) PNAS, USA 73, 128-132; their ref 1:-

1. Rosenbaum, G., Holmes, K. C. & Witz, J. (1971) *Nature* **230**, 434-437.

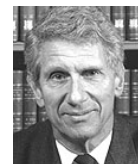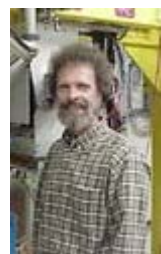

***SRS PX 7.2 on the first dedicated SR X-ray source:  
also ensuring tuneable  $\lambda$  (1.2 to 2.6 Å) and SRS PX9.6 (0.5 to 1.38Å)***

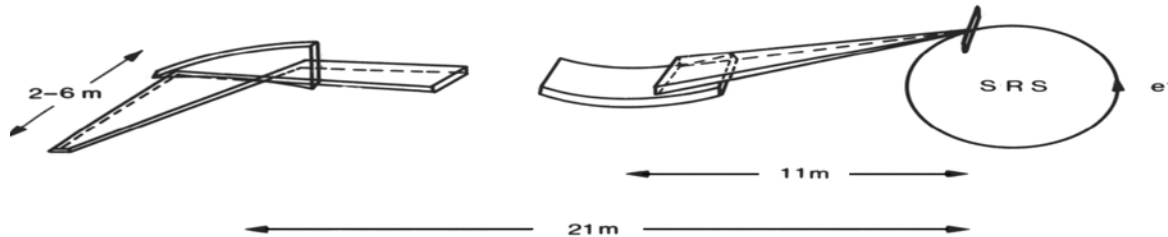

***Helliwell, Greenhough, Carr, Rule, Moore, Thompson & Worgan J Phys E 1982 SRS 7.2***

***Helliwell et al NIM (1986) A246, 617-623***

***Inspired by Keith Hodgson et al 1976 and Gerd Rosenbaum and Ken Holmes 1971***

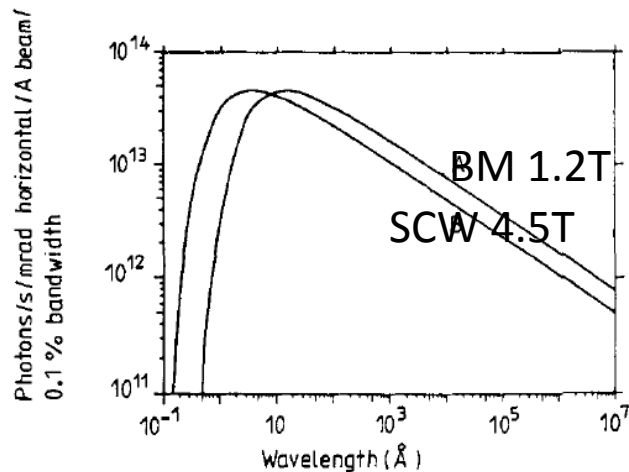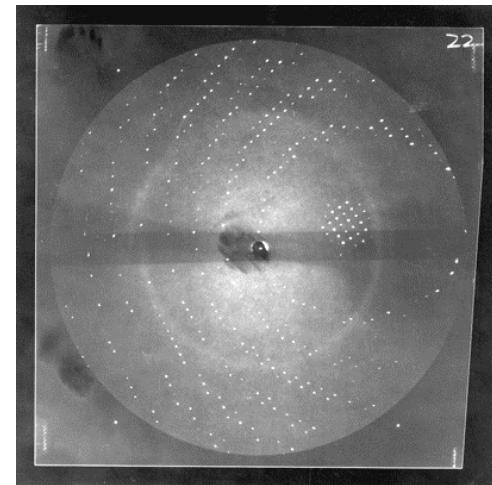

***Eg  $\lambda=2.6 \text{ \AA}$***

***I had explored gradually using wavelengths:- 0.6Å, 0.9Å, 1.488Å, 1.739Å, 1.86Å , 2.0Å, 2.6 Å.***

***Helliwell (1984) Reports on Progress in Physics 47, 1403-1497***

Even though the initial SRS was not that well suited to crystallography, especially with its horizontal source size of 14mm, initially I could get 20 times the home Lab intensity, as well as being fully tuneable. The addition of the vertically focussing mirror brought us up to x100 times.

***So we got our first SRS PX users, UK and international, and exciting results>>>***



**The Mn K edge was accessible  
on SRS 7.2 at 1.896 Å**

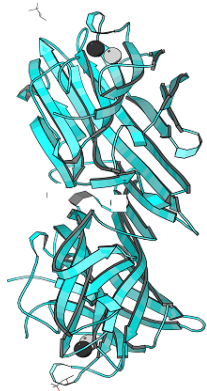

Pea lectin

Acta. Cryst.  
(1985) B41, pp.  
336-341.

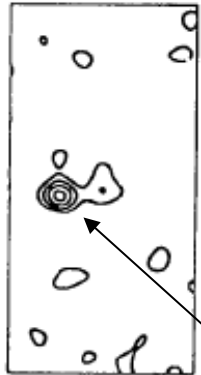

Manganese ion  
(strong anomalous  
peak)

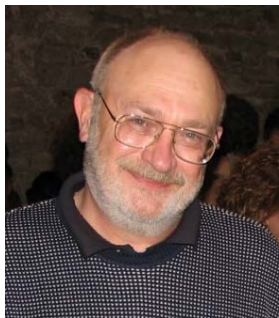

Howard Einspahr

**Purine nucleoside phosphorylase; the  
challenge of 80% solvent content in  
the crystal overcome by high  
intensity on SRS 7.2**

## Drugs by Design

SCIENTIFIC AMERICAN *December 1993*

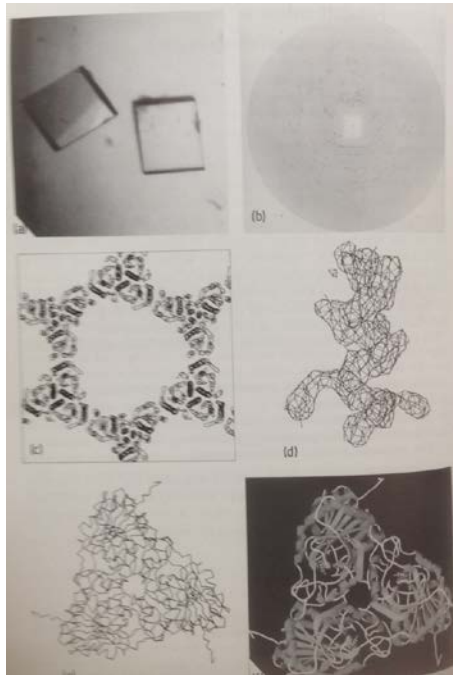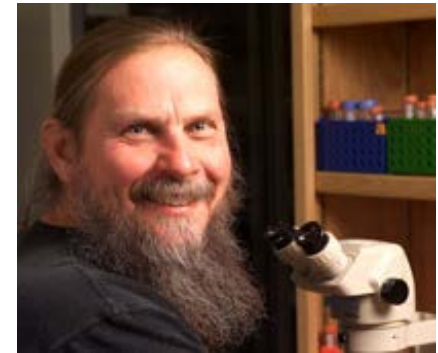

Steve Ealick

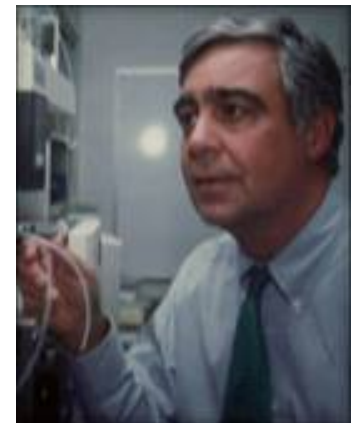

Charlie Bugg; UAB  
Prof & CEO Biocryst  
Pharmaceuticals

**Alabama**

# *Virus structures; a key step involved the methods...*

*J. Appl. Cryst.* (1983). **16**, 629–636

## **Oscillation Photography of Radiation-Sensitive Crystals using a Synchrotron Source**

BY MICHAEL G. ROSSMANN AND JOHN W. ERICKSON

*Department of Biological Sciences, Purdue University, West Lafayette, Indiana 47907, USA*

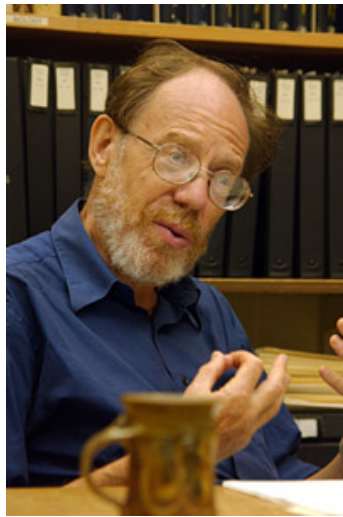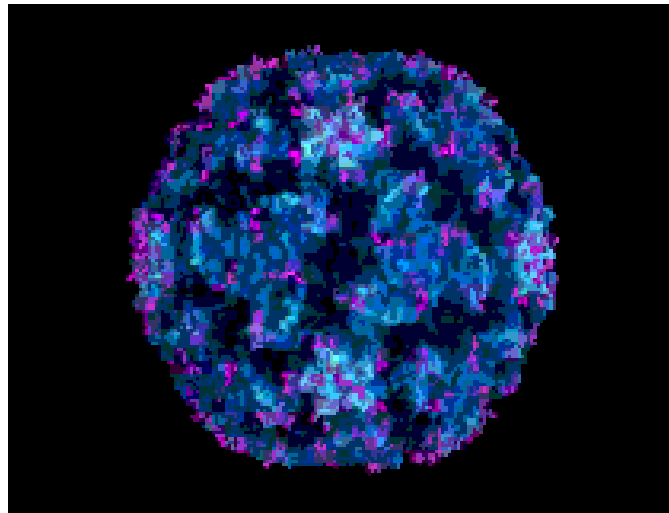

SRS Station 7.2 and Hamburg ‘DESY’:-

We wish to thank Drs Hans Bartunik and Klaus Bartels at DESY in Hamburg, Germany and Dr John Helliwell at the SRS in Daresbury, England for much help and encouragement in the difficult task of X-ray diffraction data collection of the R14 rhinovirus crystals.

Prof M G Rossmann, USA;

1985 human rhinovirus-14, HRV-14; the rhinovirus structure was finally based on diffraction data measured at **MacCHESS**.

# *Virus crystallography at SRS 9.6*

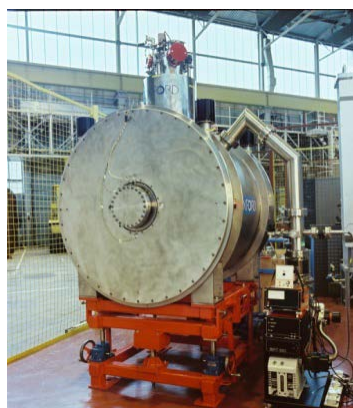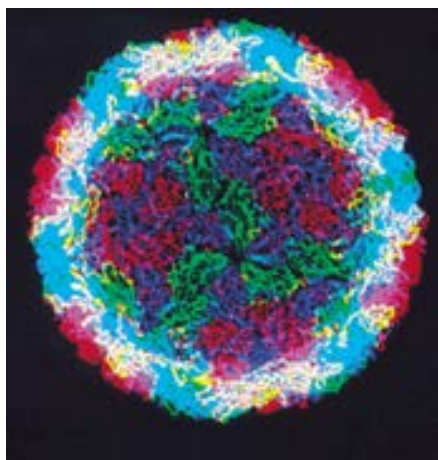

*FMDV*

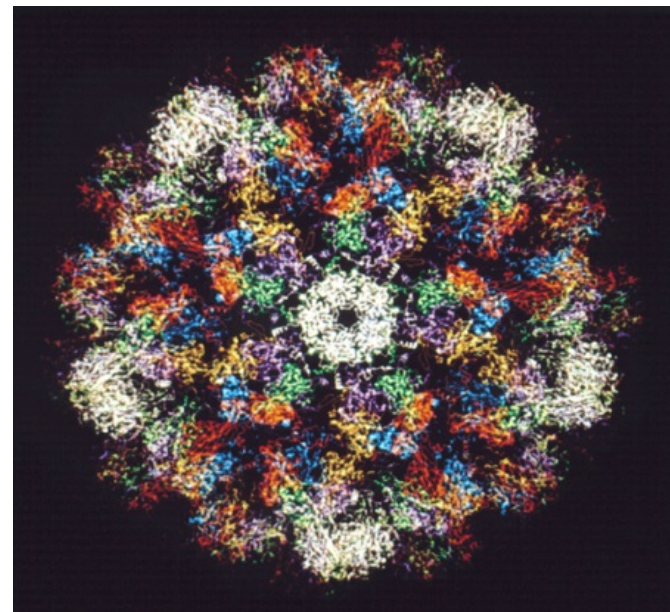

*SV 40 virion*

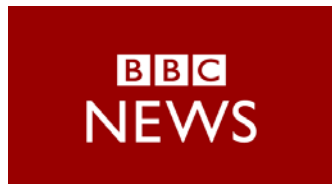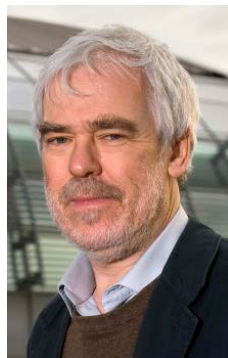

*David Stuart*

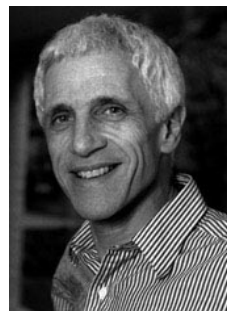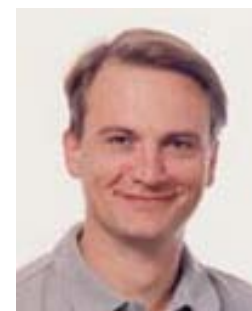

*Steve Harrison & Bob Liddington et al Harvard  
using data measured at **SRS 9.6** and CHESS*



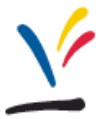

Vetenskapsrådet  
Sweden

SRS 9.5;

focussed & rapidly tuneable X-ray beam & an IP

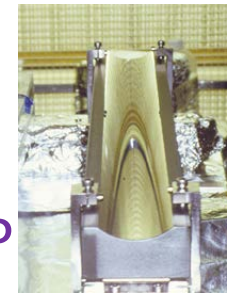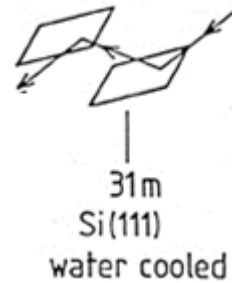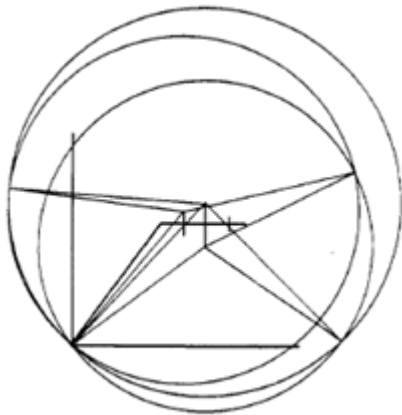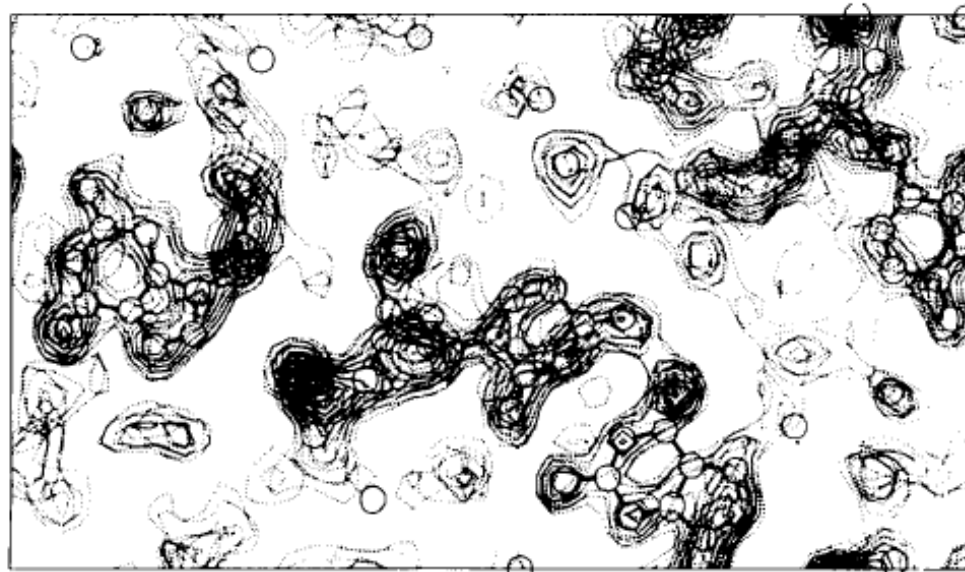

Case 5.7

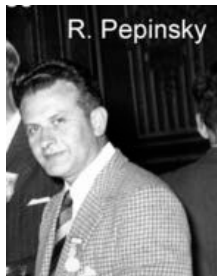

R. Pepinsky

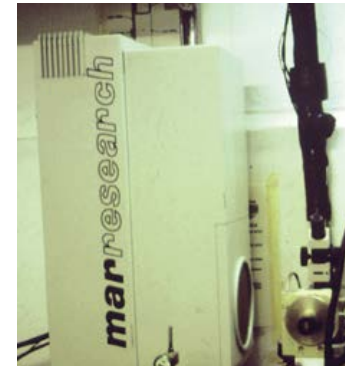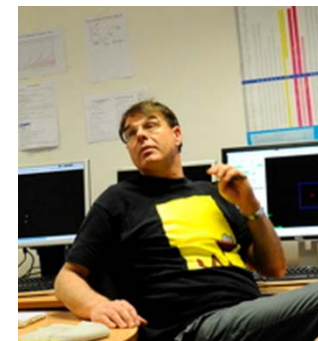

Andy Thompson

*Two wavelength phasing of a brominated oligonucleotide  
Peterson, Harrop, McSweeney, Leonard, Thompson, Hunter and Helliwell  
1996 JSR 3, 24-34*

Helliwell 1979 based on **Okaya and Pepinsky 1956**

**But we were short of intensity on SRS 9.5; this led naturally on to ESRF**

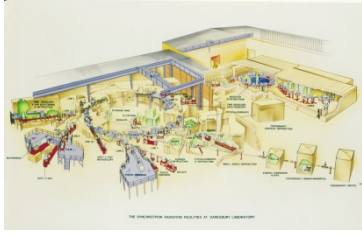

## *Let's take an overview for a moment*

- 1981 Daresbury SRS; the first dedicated '2<sup>nd</sup> generation' SR source; we attracted some of the very best users in the World
- Mid-1980s PEP as a new ring concept emerges from SSRL
- 1987 ESRF Foundation Phase Report 'Red Book'; this showed colossal increases in X-ray intensities from a new source, the X-ray undulator. Would the samples stand it?

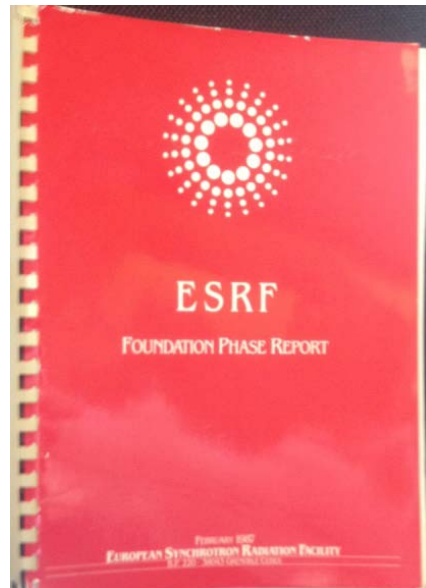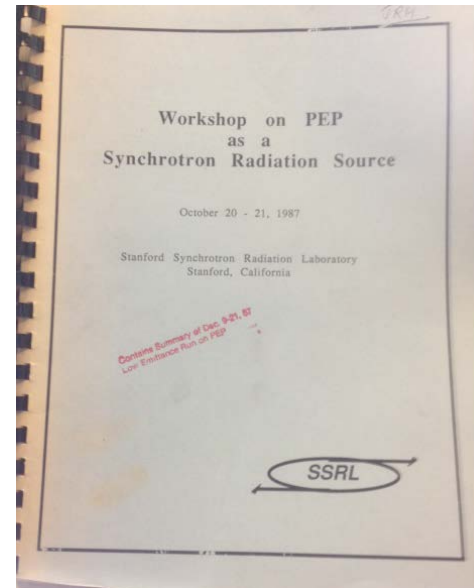

# ESRF greatly improved emittance over SRS

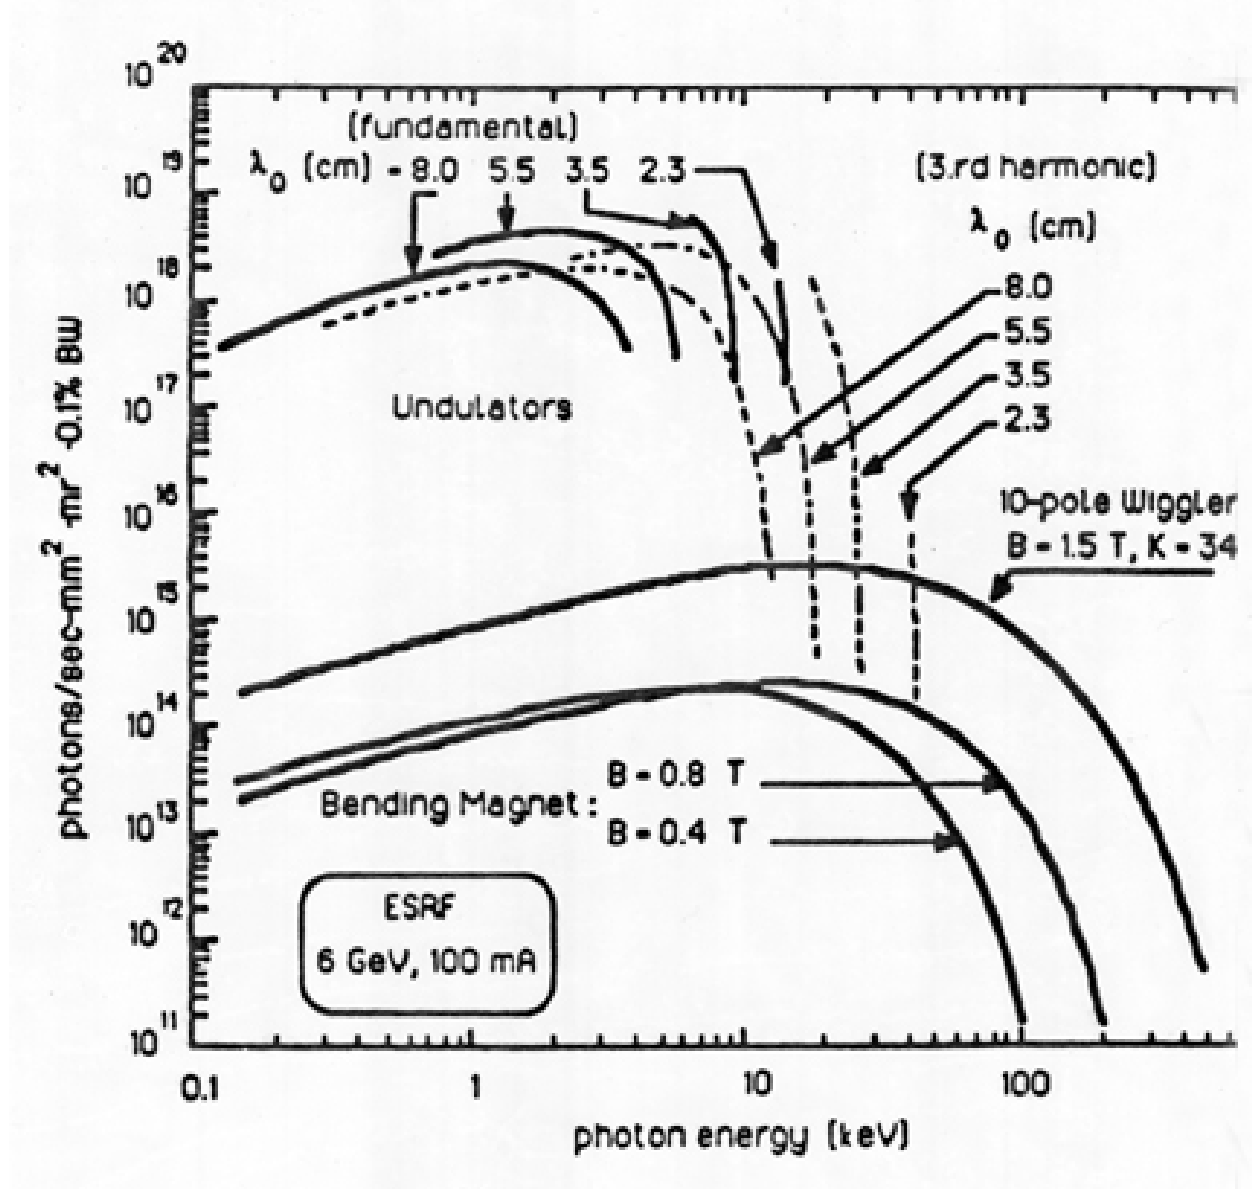

These curves were at the time of the ESRF Foundation and have improved considerably

## Biological microcrystallography with 'New Rings'

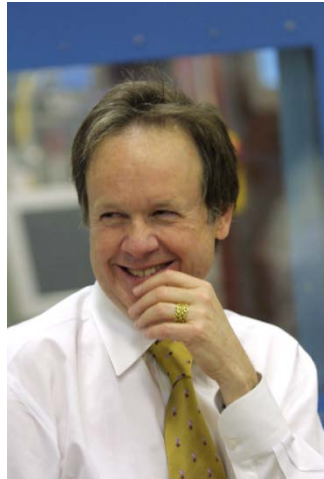

Keith Hodgson

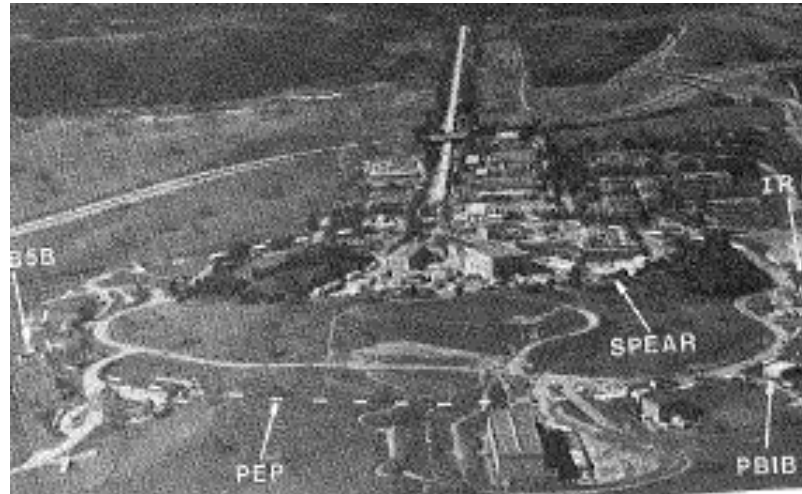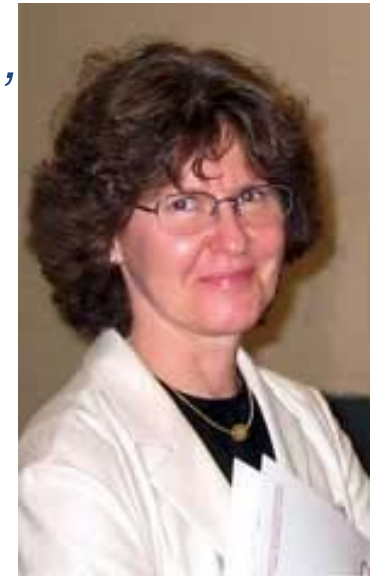

Britt Hedman

Stanford's New Rings Workshops in the early to mid 1980s

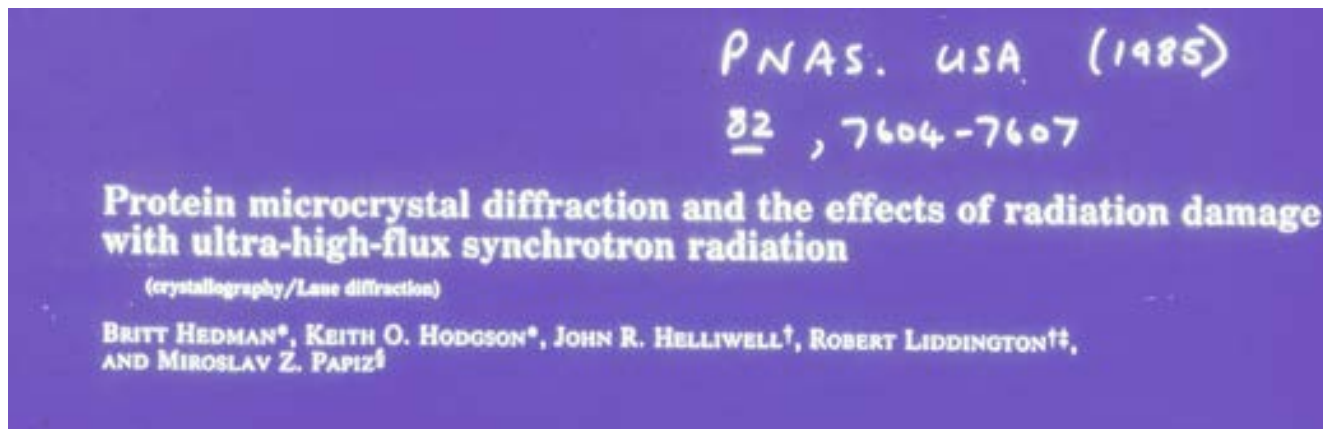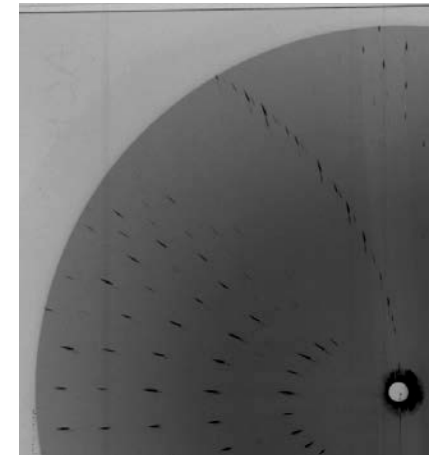

SRS wiggler white X-rays test proposed monochromatic undulator ESRF X-ray intensities



# ESRF planning by ESRP required simulation of the effect on protein crystals; beam heating and radiation damage and initiate practical *risk assessment* experiments

J.R. Helliwell and R. Fourme 'The ESRF as a facility for protein crystallography: A report and design study'. ESRP Report IRI-4/83(1983), pp. 1-36.

*J.R. Helliwell / Protein crystal perfection and nature of radiation damage*

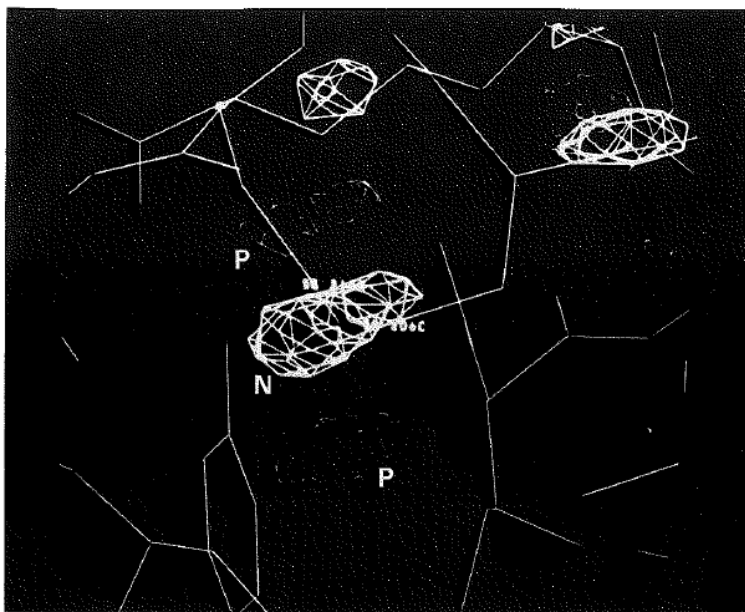

P=positive  
N=negative  
electron density

10MRad = 0.1MGy

$$(F_{\text{damaged}} - F_{\text{undamaged}}) \exp(\alpha_{\text{calc}})$$

ie a 20 + 2 Mrad data set at Stanford – a 0+ 7.5Mrad of X-ray dose data set at Daresbury

Splitting of disulphide bridges in proteins due to X-rays;  
based on a suggestion of Greg Petsko

A beam heating risk management strategy was offered  
(*Cryo has superceded this!*):-

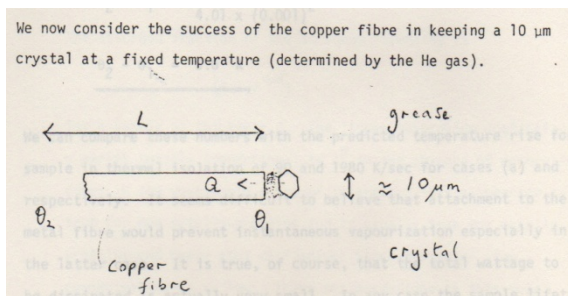

20Ks<sup>-1</sup> adiabatic!



# ***Our science applications***

# The statistics: SR MX dominates the X-ray PDB depositions

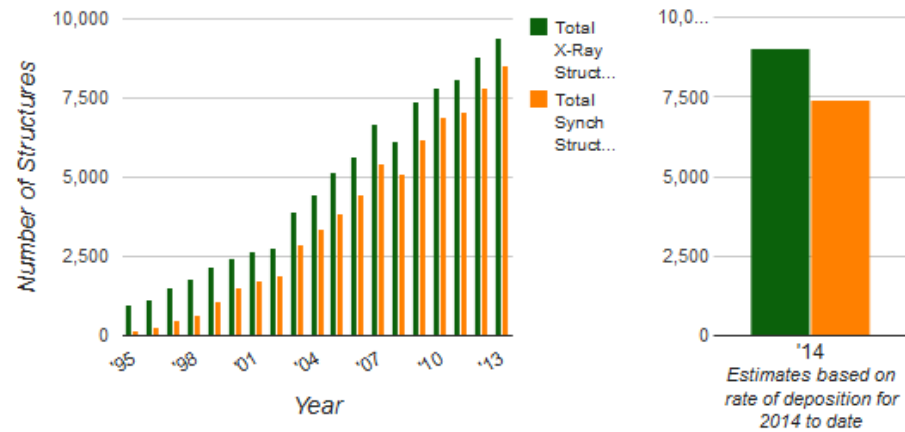

Regional distribution of PDB structures determined at synchrotron facilities through 2013

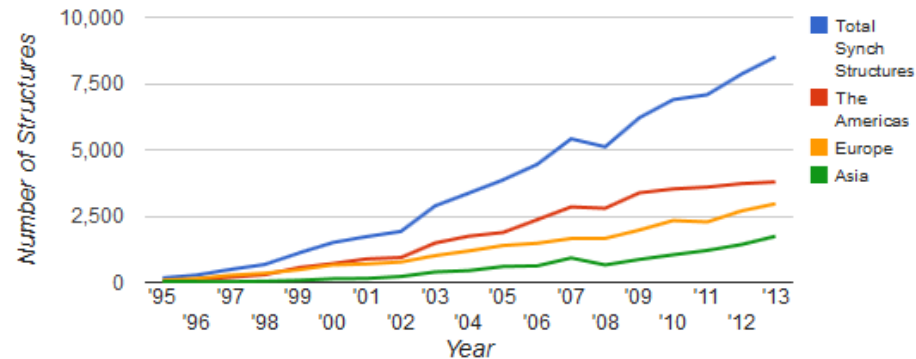

***MAD/SAD (inc density modification) methods and molecular replacement, software (CCP4, Phenix, SHELX, Il Milione ....), Cryo, Automation, gene expression are all very relevant to the rate of MX structure determinations ie some SR specific aspects and some not***

# *Seleno-methionine* hydroxymethylbilane synthase fluorescence scan measured at SRS 9.5

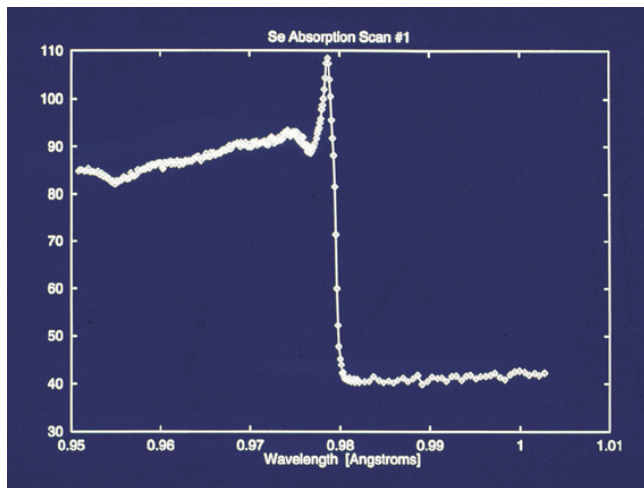

## Anom diff Patterson maps

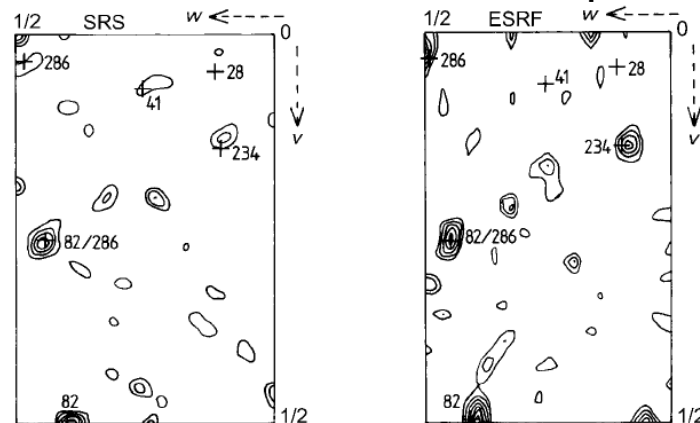

In Haedener et al 1999 Acta Cryst D the SRS 9.5 and ESRF BM14 comparison showed the viability of the new stations and of the ESRF electronic detector

With Alfons Haedener,  
Basle Univ

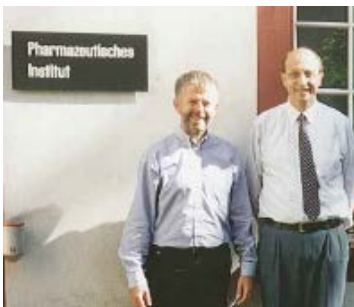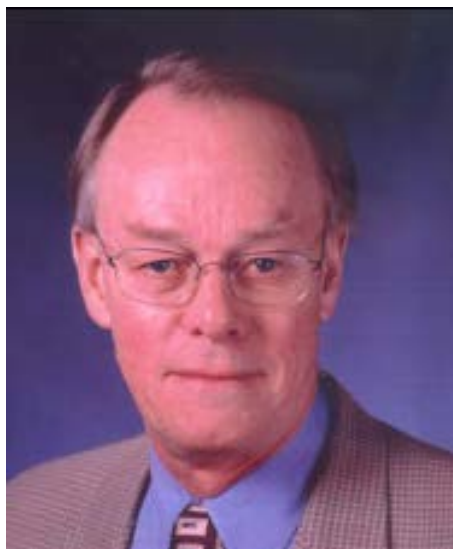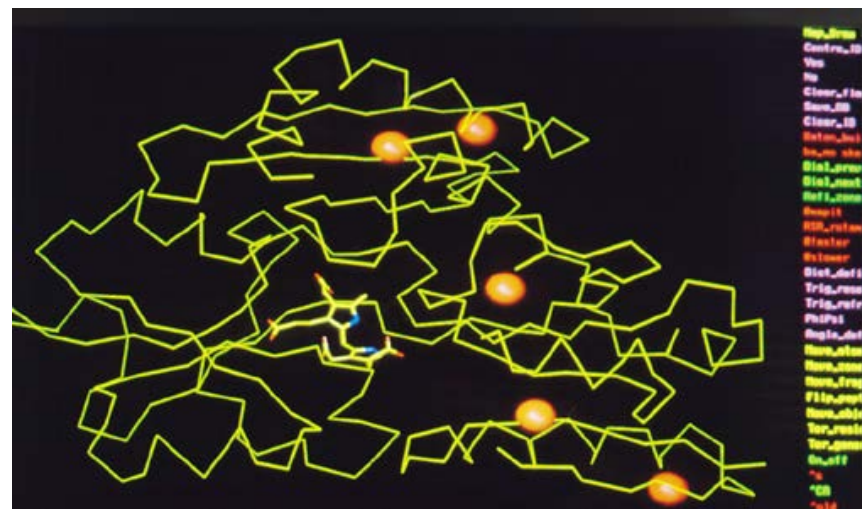

Inspired by Wayne Hendrickson

# Manchester *Manchester DLS user remote access*

Protein  
Structure  
Facility

- 50% of SR Time is Remote Access
  - *Short frequent shifts (5 hours)*
  - *Reduced reliance on in house X-Rays*

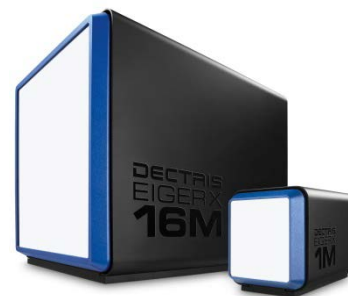

EIGER

- Dramatic increase in throughput
  - *Hybrid Pixel detectors are FAST!*
  - *> 100 samples per shift (8 hours)*
  - *In-house we now focus on crystallogenesis*
  - *>1TB of data per month*

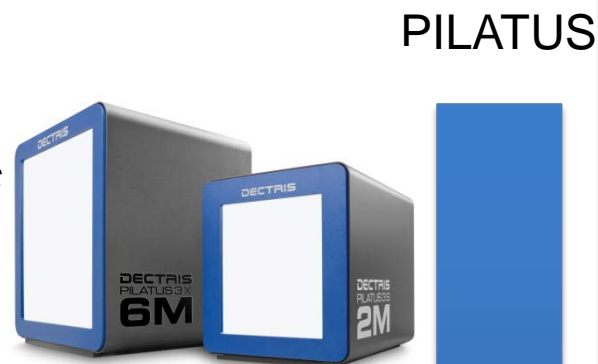

PILATUS

- What are the bottlenecks?
  - *Mounting + centering the samples!*
  - *Maintaining a supply of crystals*

Data Volume

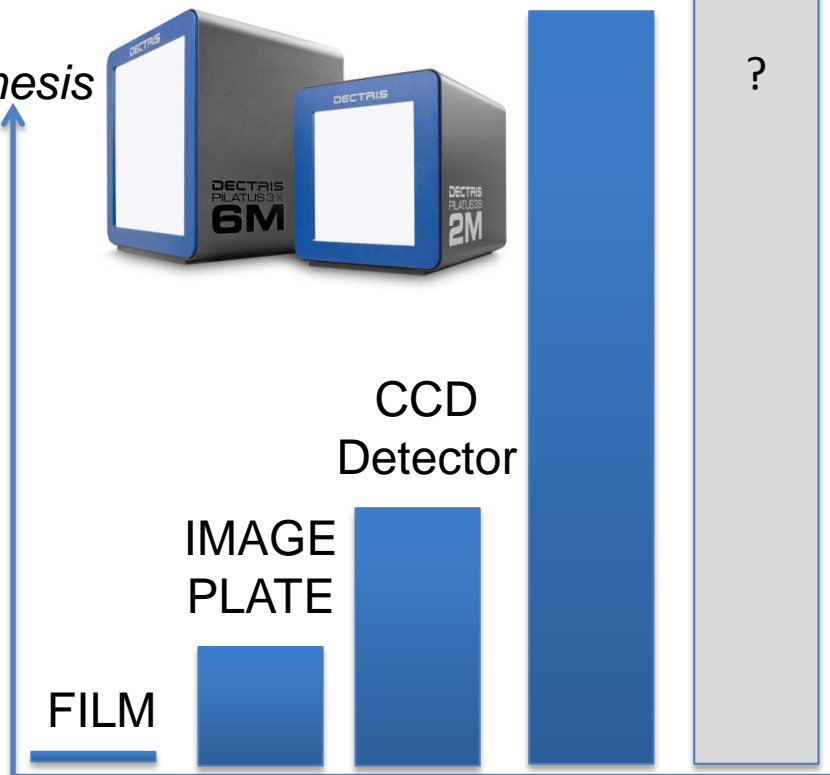

MANCHESTER  
1824

The University of Manchester  
Manchester Institute of Biotechnology

*Kindly prepared by Dr. Colin Levy, MIB*

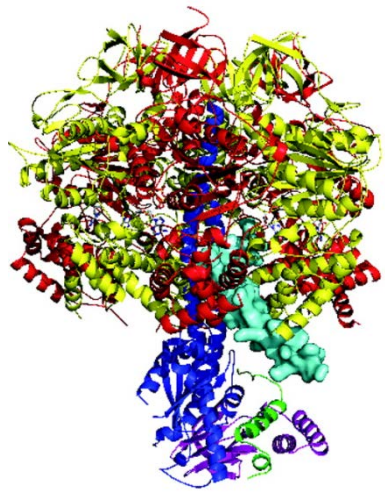

***Such crystal structures of molecular machines transform the understanding of biology***

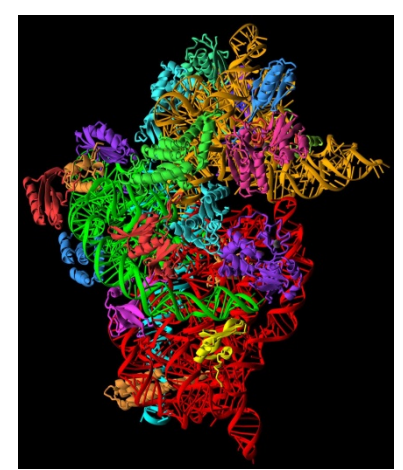

***“Not only are SYNC-derived structures larger on average than HOME-derived ones, but they are also harder to determine because the B factors are larger. This represents the crux of the power of synchrotron radiation for macromolecular crystallography.”***

*J. Synchrotron Rad.* (2004). **11**, 319-327

**Protein Data Bank depositions from synchrotron sources**

**J Jiang and R M Sweet**

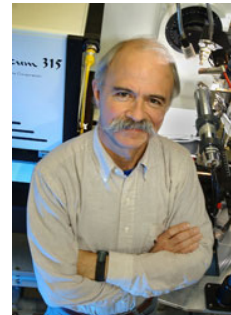

**Bob Sweet**

Concanavalin A studied *with small molecule accuracy* at 0.94Å resolution

Resolving protonation states

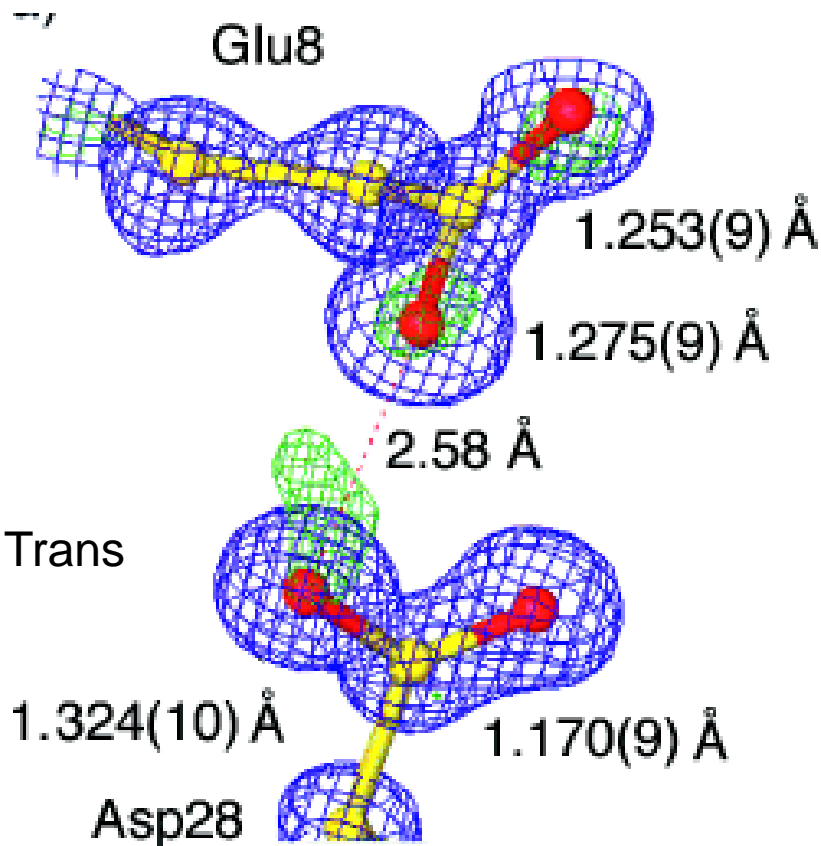

Deacon et al 1997  
J Chem Soc Faraday Trans

*Dauter, Jaskolski & Wlodawer J. Synchrotron Rad. (2010) 17, 433–444*  
"Without synchrotron radiation it would not be possible to obtain atomic resolution (defined as 1.2Å) or especially ultrahigh-resolution diffraction data from protein crystals."

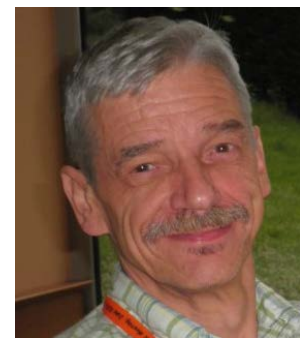

Zbysek Dauter



## *The SR Laue method was an unexpected development*

Durward Cruickshank and I joined with Keith on this!

A key result from SRS 9.6: learning that, by far, the Bragg reflections were in singlet Laue spots and which contradicted the early pioneers' writings such as W L Bragg

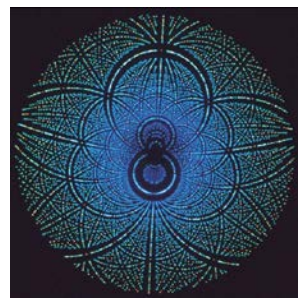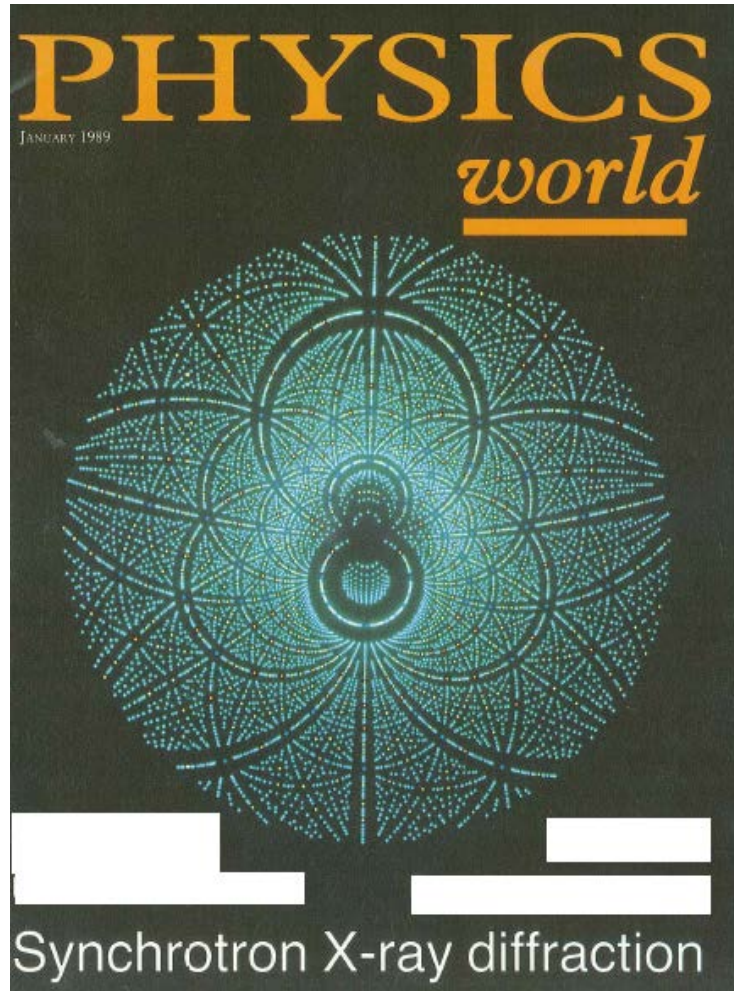

**Moffat:**  
*“With the ESRF or APS a single bunch allows nsec Laue protein crystallography”*

C H M

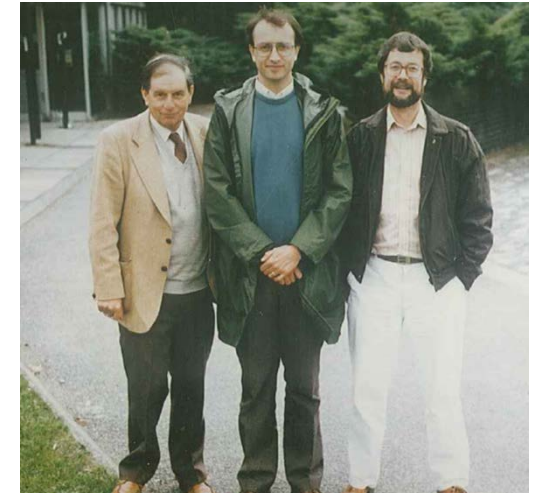

Outside York University Physics Dept

Colour coding:- →  
Green are singlet reflections Laue spots;  
Other colours are for doublets, triplets etc

Cruickshank, Helliwell & Moffat Acta. Cryst. A43, 656-674 (1987)



*Time-resolved: spectacularly Keith Moffat used SR Laue to do nanosecond protein crystallography with CO myoglobin then PYP*

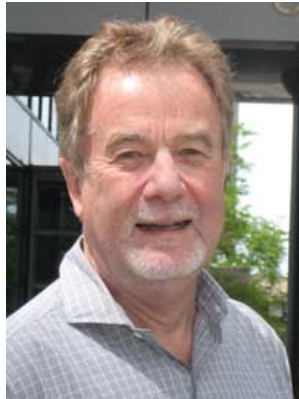

Keith Moffat

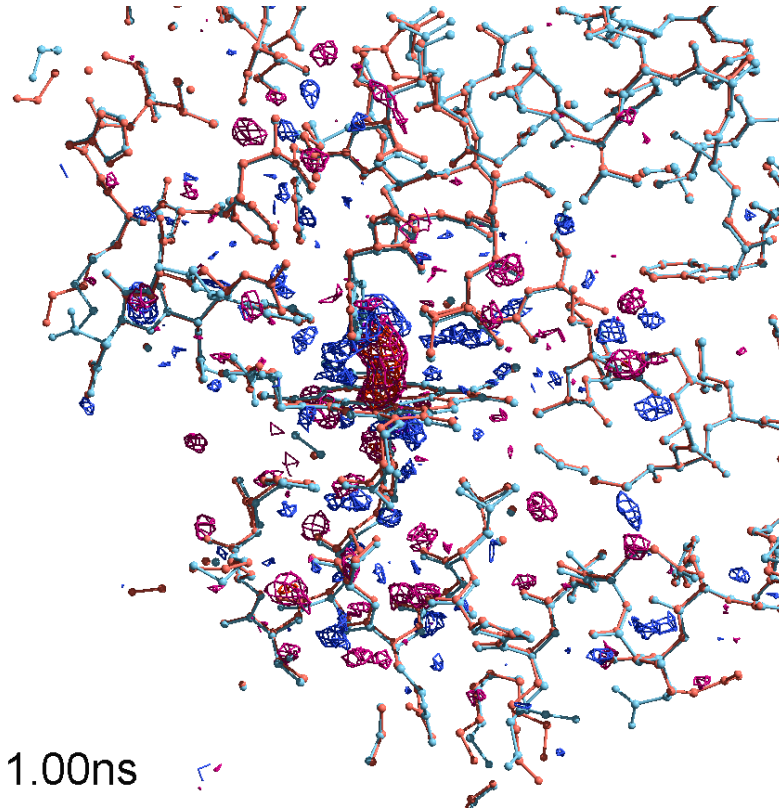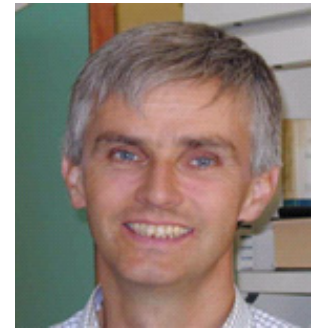

Michael Wulff,  
ESRF

Šrajer, Ren, Teng, Schmidt, Ursby, Bourgeois, Pradervand, Schildkamp, Wulff and Moffat  
Protein Conformational Relaxation and Ligand Migration in Myoglobin:  
A Nanosecond to Millisecond Molecular Movie from Time-Resolved Laue X-ray Diffraction.  
*Biochemistry* (2001), **40** (46):13802–15

Time-resolved structures of *hydroxymethylbilane synthase*Helliwell et al J Chem Soc Faraday Trans 1998, 94(17), 2615–2622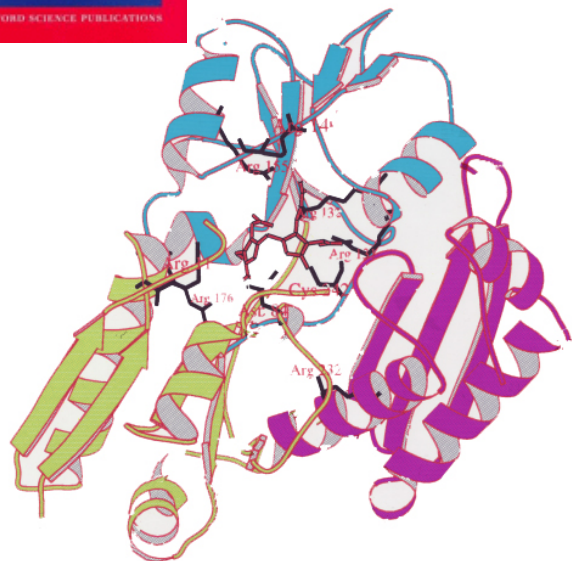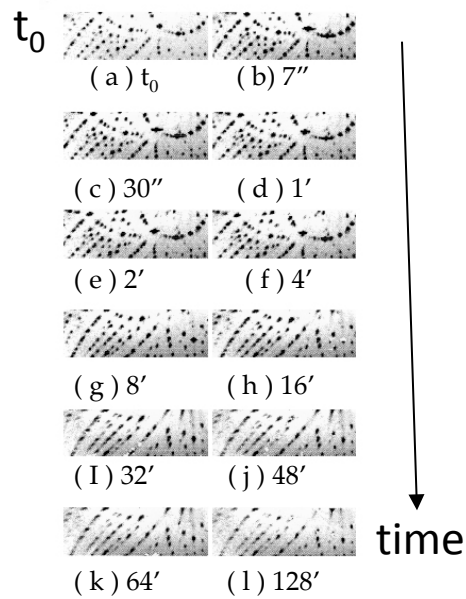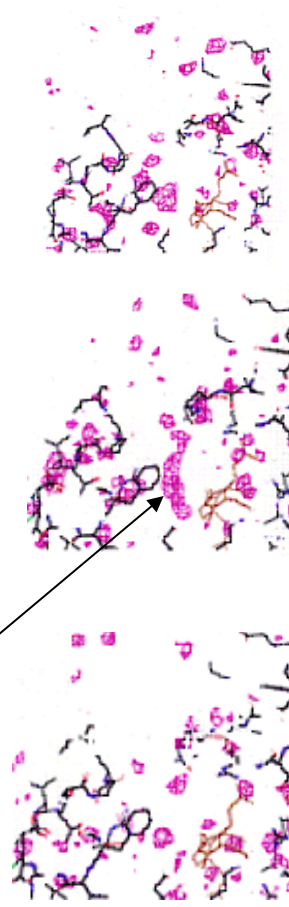Good  
Laue  
maps  
using  
their  
EAD.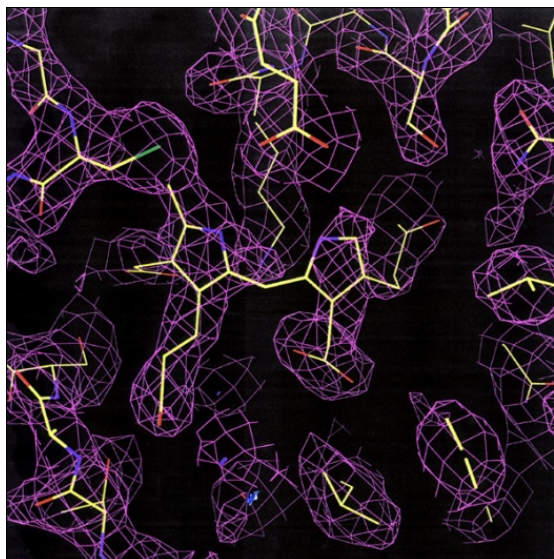

Transient electron density in the enzyme active site

The Laue method *and the Daresbury Laue data processing* software were enthusiastically taken up at the Grenoble neutron reactor source>>>

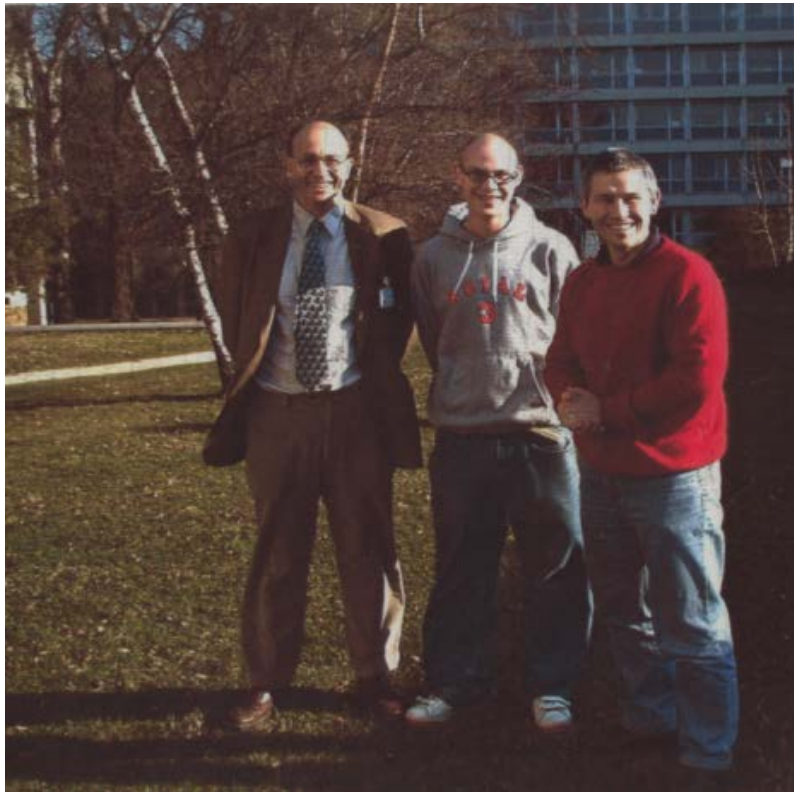

Matthew Blakeley  
Dean Myles

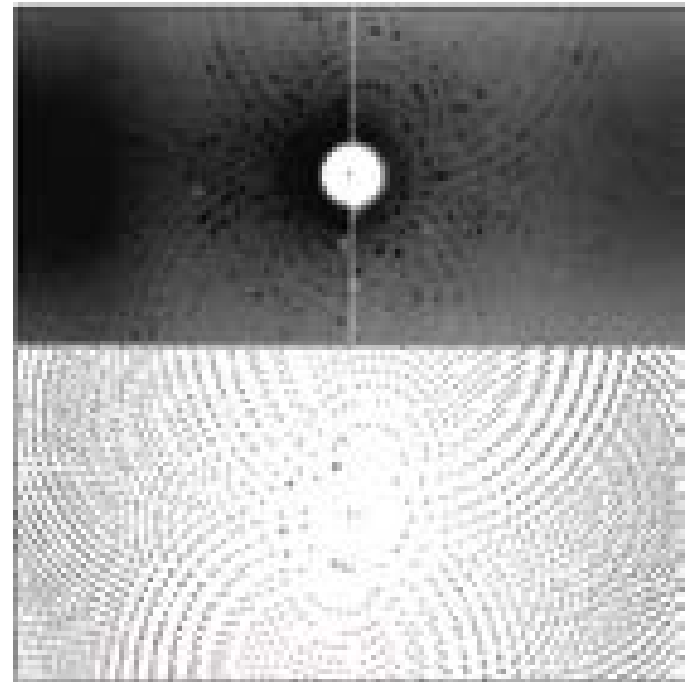

**50kDa** glucoside concanavalin A  
I<sub>2,3</sub> a=168 Å  
Gilboa, Myles, Habash, Raftery & Helliwell  
(2001) J Appl Cryst 34, 454-457



# Spin off: the EMBL Laue neutron Diffractometer in Grenoble & more efficient use of many more of the emitted neutrons

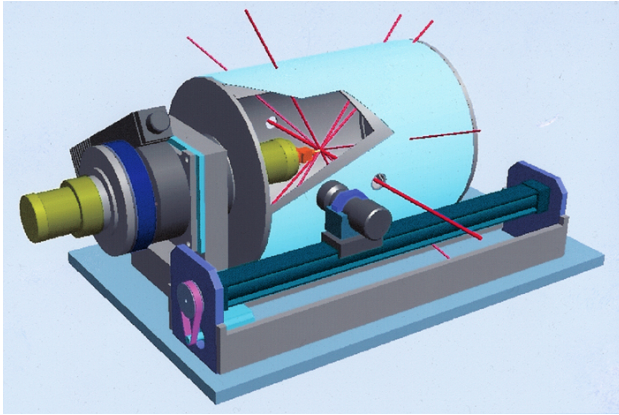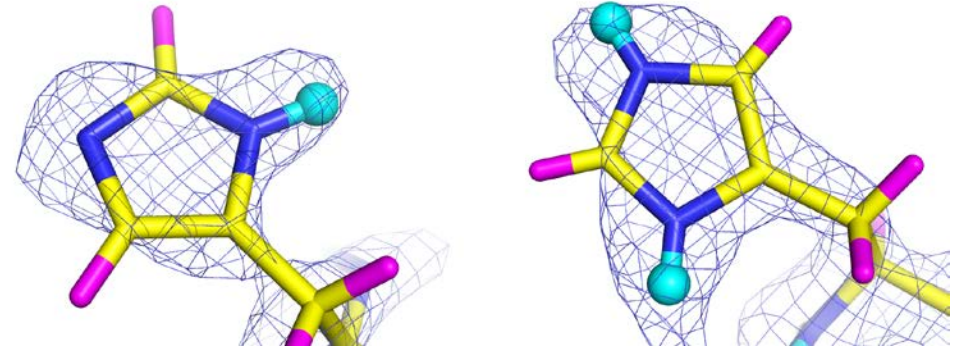

Resolving histidine protonation states with neutrons

> Gd<sub>2</sub>O<sub>3</sub>-doped neutron sensitive image plate

➤ Typical neutron beam wavelength range: ~2.7 – 3.6 Å

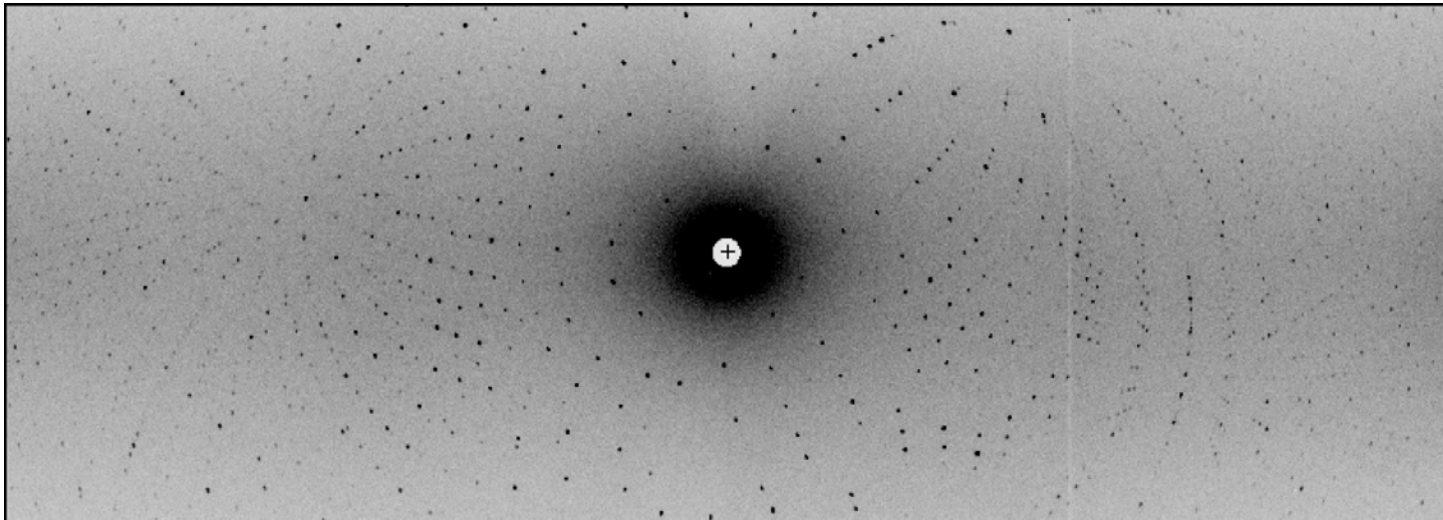

*Neutron Laue data are processed with the 'Daresbury Laue software'; this software was validated with case studies from SR Laue data measured on SRS 9.6 and at ESRF ID09.*

# ***Current & future beamline developments***

## Microbeam scanning to select the best portion of a crystal

A diffraction grid scan 9 x 9 micron beam in a typical raster of 20 x 20 micron

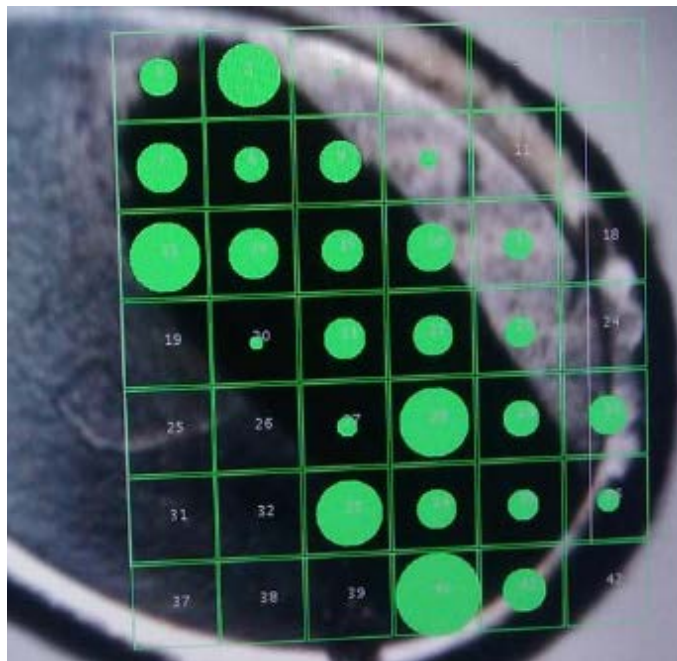

Alpha-crustacyanin crystal

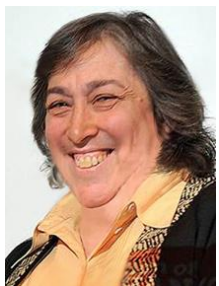

Example JRH use of **DLS microfocus beamline**

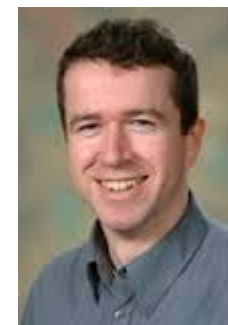

Naomi Chayen

Underway at DLS is the design, construction and operation of the submicron **VMXm beamline** aimed at delivering a **beam size of between 0.5 and 5 microns**.

For a recent overview of SR microcrystal diffraction see  
**Macromolecular microcrystallography**  
Evans, Axford, Waterman & Owen (2011) Cryst Rev 17, 105-142

Gwyndaf Evans

## *ESRF ID 13 optical schemes and X-ray foci available*

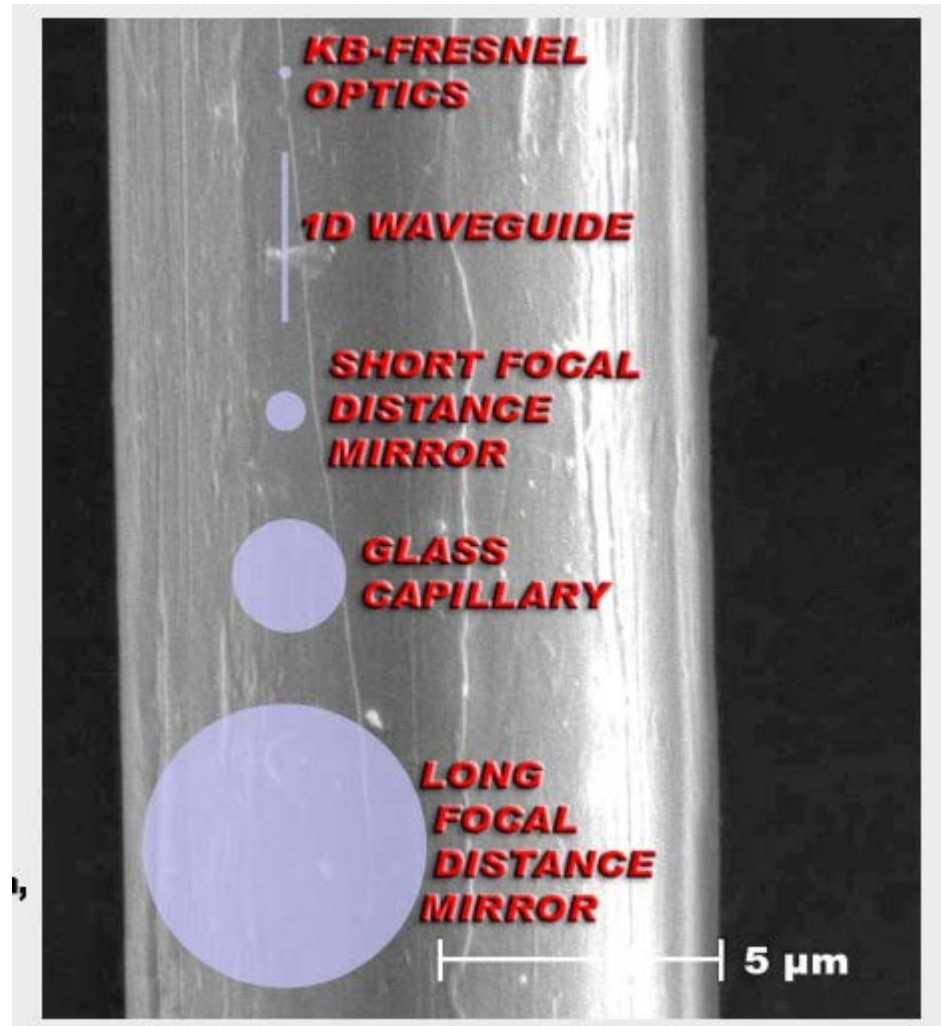



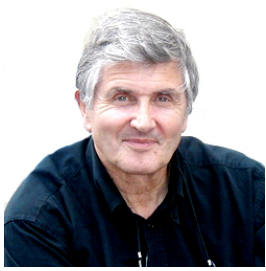

# Enthusiasm for ultra short wavelength

Roger Fourme

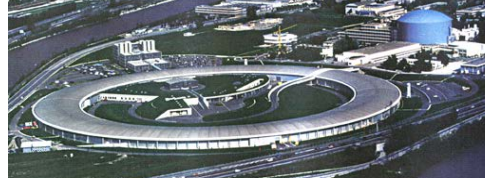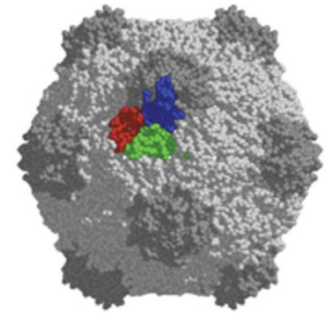

Cowpea Mosaic Virus  
0.35 GPa

*J. Synchrotron Rad.* (2011). **18**, 31-36

**A new paradigm for macromolecular crystallography beamlines derived from high-pressure methodology and results**

[R. Fourme](#), [E. Girard](#), [A.-C. Dhaussy](#), [K. Medjoubi](#), [T. Prangé](#), [I. Ascone](#), [M. Mezouar](#) and [R. Kahn](#)

*J. Appl. Cryst.* (2012). **45**, 652-661

**Reduction of radiation damage and other benefits of short wavelengths for macromolecular crystallography data collection**

[R. Fourme](#), [V. Honkimäki](#), [E. Girard](#), [K. Medjoubi](#), [A.-C. Dhaussy](#) and [R. Kahn](#)

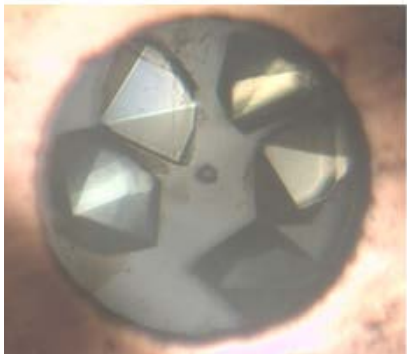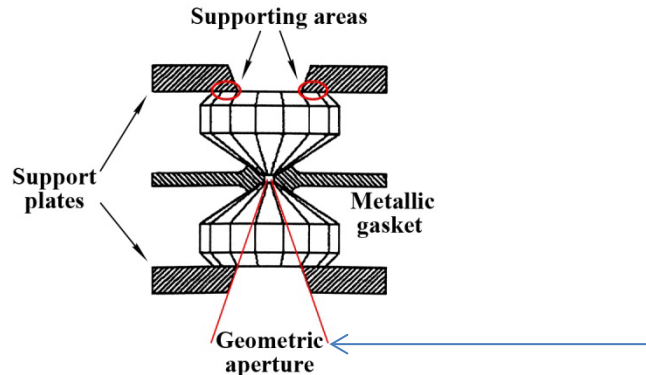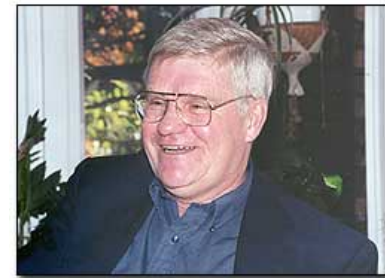

Jack Johnson



# Protein Crystallography at Ultra-Short Wavelengths

Xe K edge & elastase

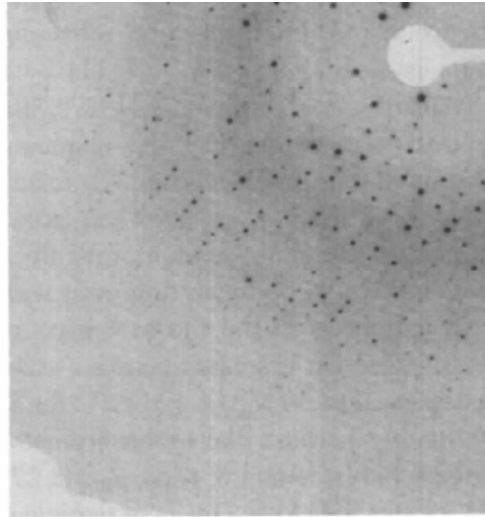

Ho K edge & HEWL

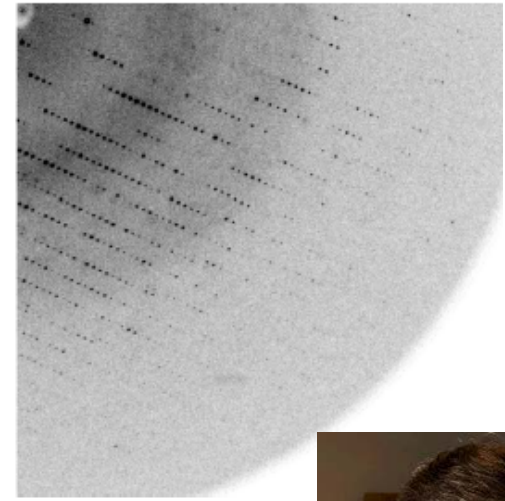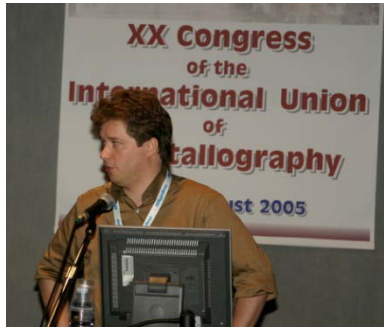

Marc Schiltz

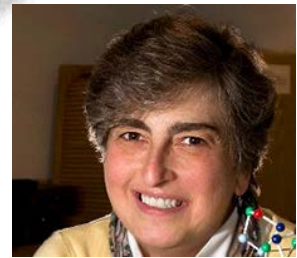

Vivian Stojanoff

*J. Synchrotron Rad.* (1997). **4**, 287-297 [ [M. Schiltz](#), [Å. Kvick](#), [O. S. Svensson](#), [W. Shepard](#), [E. de La Fortelle](#), [T. Prangé](#), [R. Kahn](#), [G. Bricogne](#) and [R. Fourme](#) ]

*J. Appl. Cryst.* (2006). **39**, 831-841

[J. Jakoncic](#), [M. Di Michiel](#), [Z. Zhong](#), [V. Honkimaki](#), [Y. Jouanneau](#) and [V. Stojanoff](#)

# Enthusiasm for MX at longer wavelengths for eg K edges of sulphur and phosphorous!!

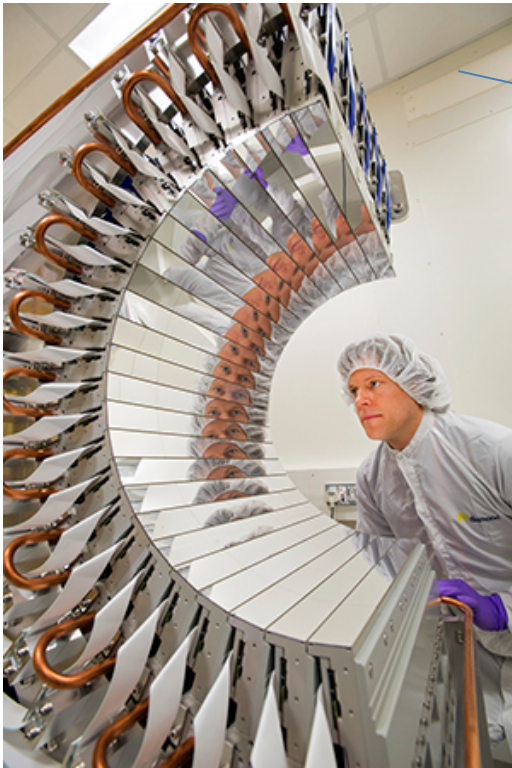

Detector readout  
electronics box

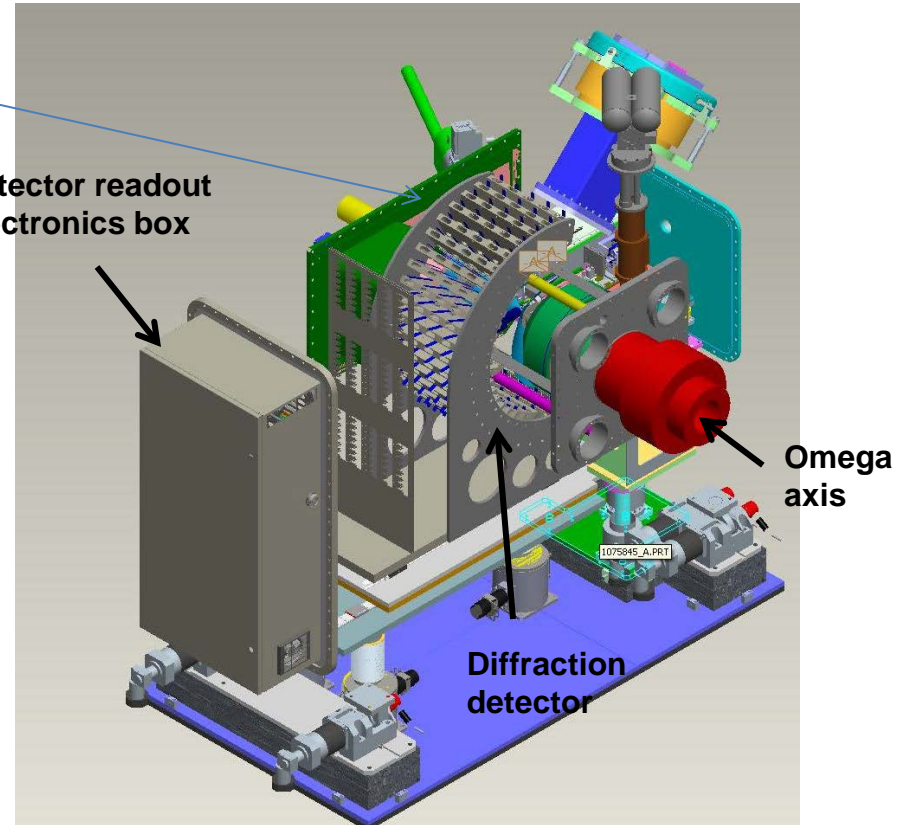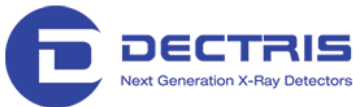

## A masterpiece of instrumentation!!

*DLS I23: in-vacuum end station led by Armin Wagner  
(Lecture in IUCr MS-40)*

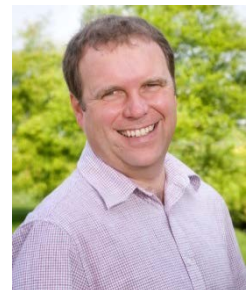

***New X-ray sources  
the national 3<sup>rd</sup> generation  
sources; the ultimate storage  
rings; the X-ray lasers***

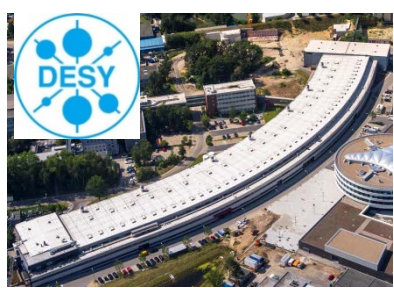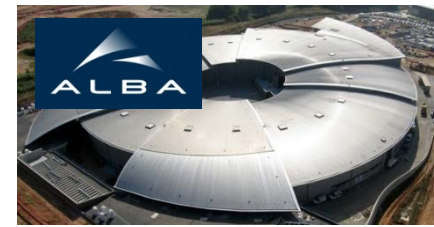

- New SR sources: PETRA III the most brilliant ie the 'ultimate storage ring' ; also soon NSLS II, MAX IV
- Diamond Light Source is a cutting edge source for UK with a vibrant research and development programme
- ALBA likewise is a cutting edge SR source for Spain
- Soleil for France.....
  
- ESRF has a new upgrade programme for nanofocus beams; also APS upgrade at advanced planning
  
- The X-ray laser: towards nanoclusters of molecules

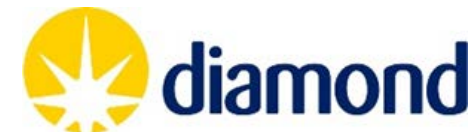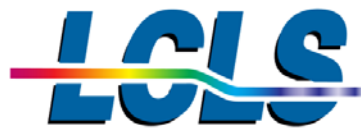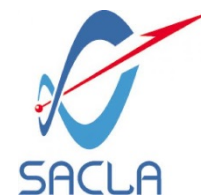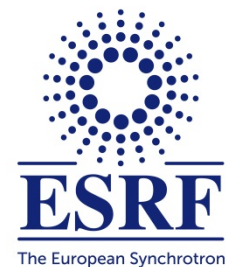

4 July 2014 Last updated at 11:33

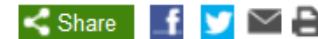

## Upgrade for Europe's big X-ray light source

*Expected characteristic of an ESRF Phase II MX beamline*

|                                          | Current               | New Lattice<br>(current<br>optics) | New lattice<br>(perfect<br>optics) | New Lattice<br>(50:1) |
|------------------------------------------|-----------------------|------------------------------------|------------------------------------|-----------------------|
| Beamsize @ sample<br>( $\mu\text{m}^2$ ) | ~60 x 30              | 30 x 25                            | 20 x 4                             | 1.2 x 0.2             |
| Flux @ sample (ph/sec)                   | ~1 x 10 <sup>13</sup> | ~1 x 10 <sup>14</sup>              | ~1 x 10 <sup>14</sup>              | ~1 x 10 <sup>14</sup> |

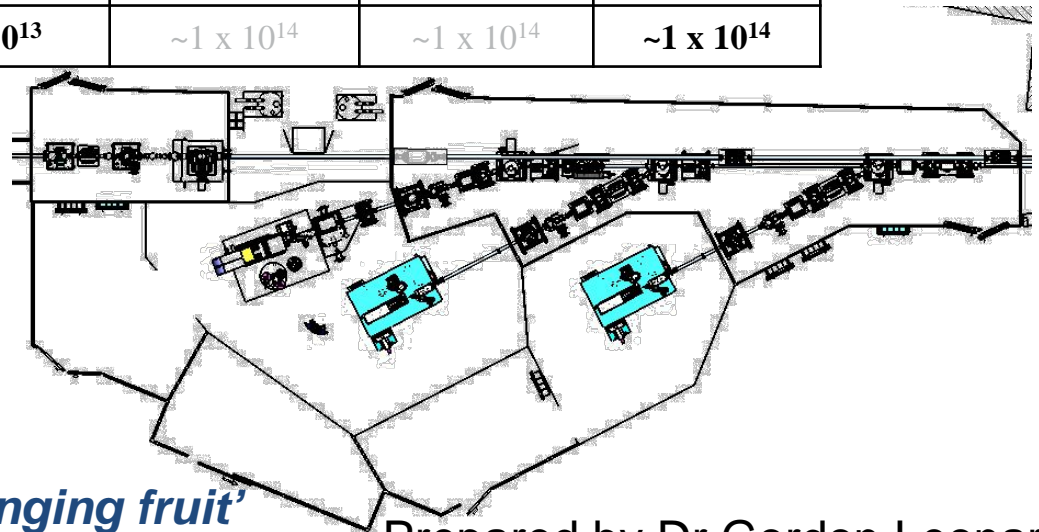

**MASSIF**  
Massively Automated  
Sample Selection  
Integrated Facility  
 to assist with reaching the 'high hanging fruit'

Prepared by Dr Gordon Leonard

# *Spin offs*

*SR commercial MX usage; SR  
chemical crystallography ; neutron  
MX*



Spin off: *Daresbury Analytical and Research Technical Services* (DARTS); an important aspect of the Economic Impact of the SRS

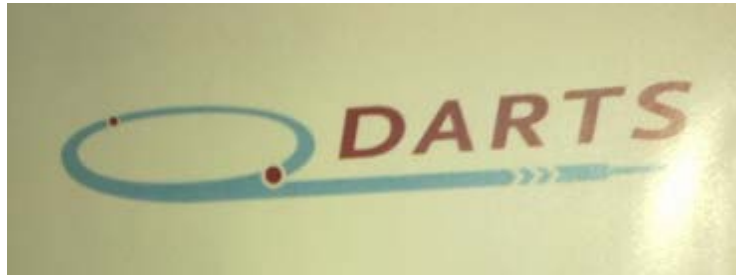

*E.J. Maclean, P.J. Rizkallah and J.R. Helliwell (2006) Protein Crystallography and Synchrotron radiation European Pharmaceutical Review Issue 2, p71-76*

Approx £300k income to SRS per annum;

*Australia and Canada* each pushed on the usual ceiling of a '10% maximum' commercial use.

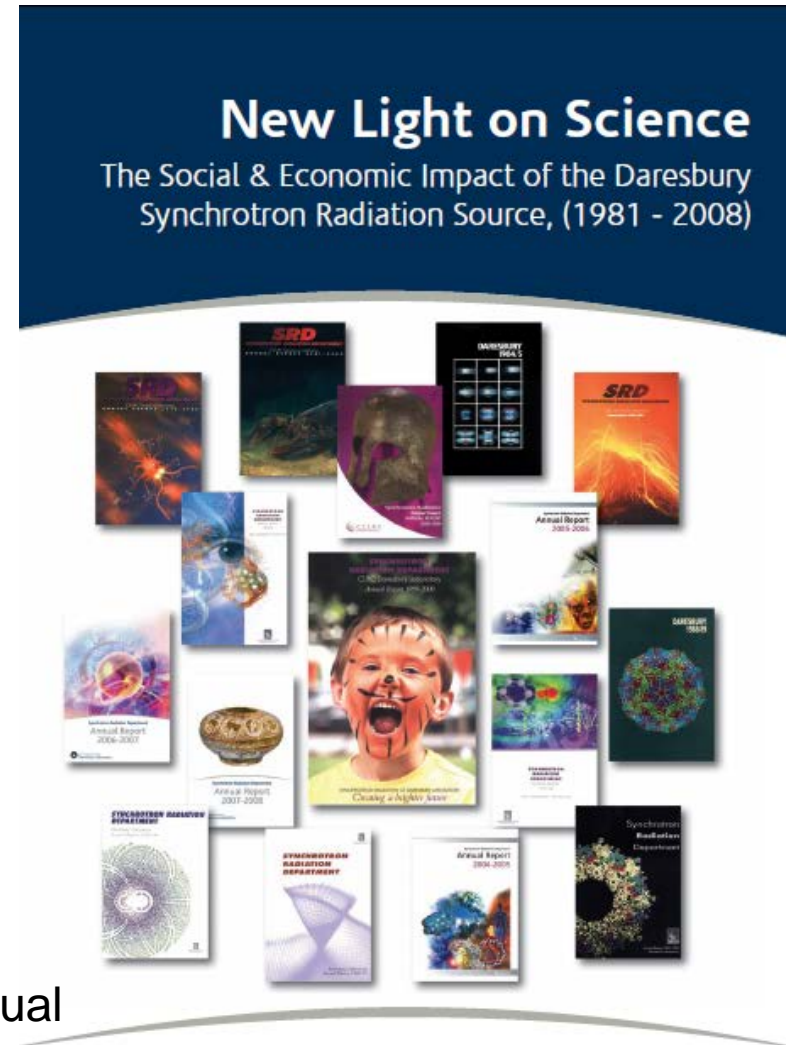

## *Canadian Light Source World ranked industrial use: 12 to 15% average and upto 25% allowed per beamline*

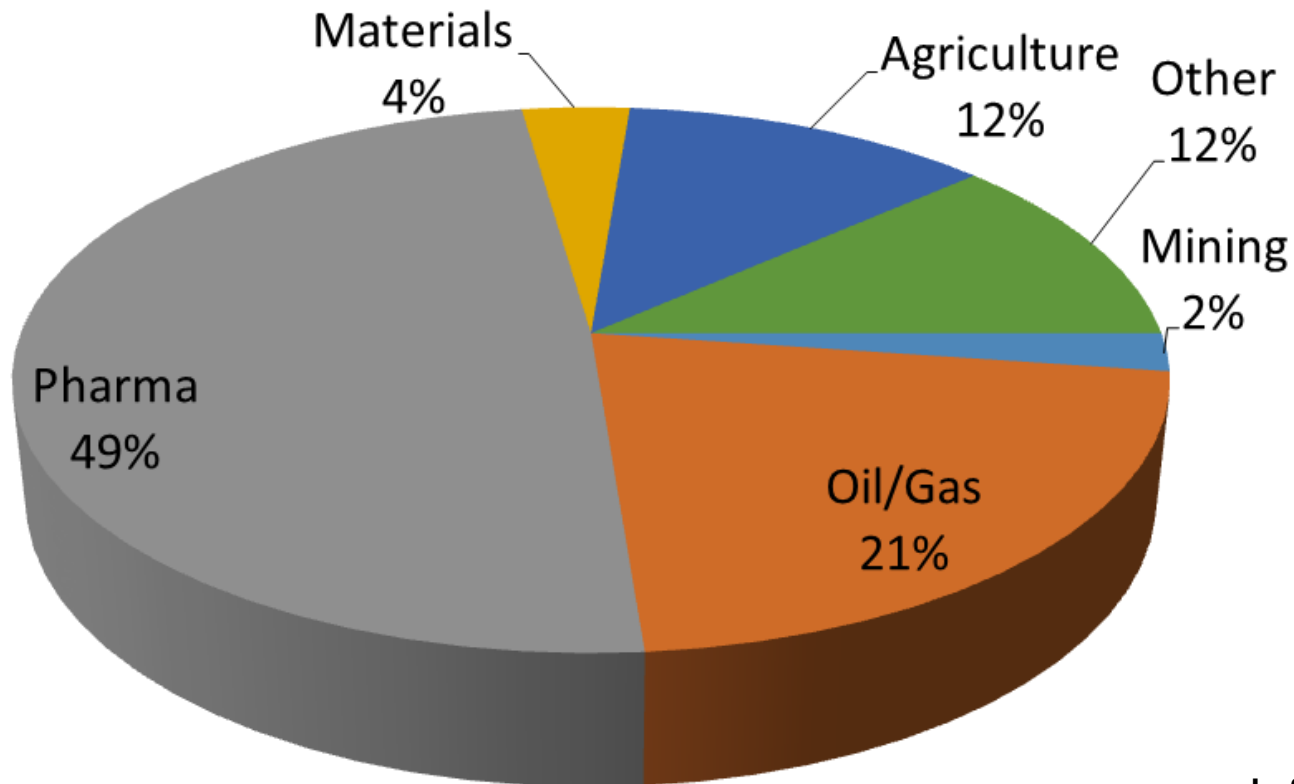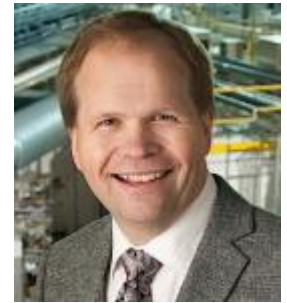

Jeffrey Cutler, CLS

*“Analytical services comprises 65% industrial useage of CLS and Collaborative longer term research comprises 35%.*

*Overall CLS has served more than 50 industrial clients with Can\$2.4M revenue to CLS since 2005/6.”* **Jeffrey Cutler** SR News (2014) 27, 3, p3-6.



# *SR chemical crystallography early details at SRS PX 9.6*

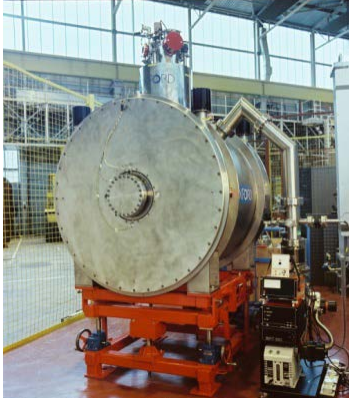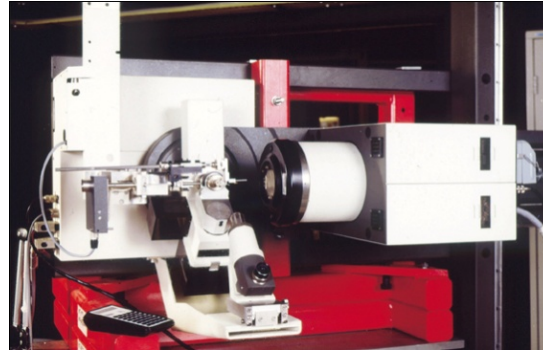

*As well as film we broke new ground with the **Enraf Nonius FAST TV** diffractometer; this was the design of **Uli Arndt** & is shown installed on SRS 9.6*

Helliwell et al NIM (1986) A246, 617-623; *tunable  $\lambda$  (0.6 to 1.5Å)*.

*S.J. Andrews, M.Z. Papiz, R. McMeeking, A.J. Blake, B.M. Lowe, K.R. Franklin, J.R. Helliwell and M.M. Harding  
'Piperazine Silicate (EU-19) - The structure of a very small crystal determined with synchrotron radiation'  
Acta. Cryst. B44, 73-77 (1988)*

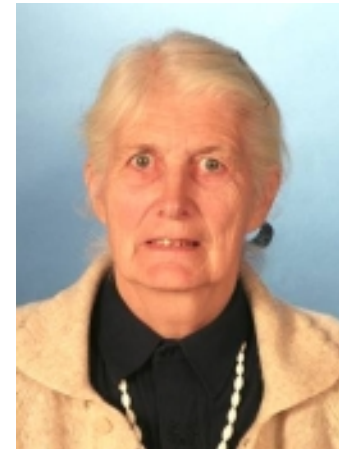

Marjorie Harding

Marjorie Harding's work on SRS 9.6 led onto SRS 9.8, SRS16.2 and DLS I19

# Spin off: MAD chemical crystallography using SRS9.8:

an 11 wavelength expt  
of a gallium substituted

ZnULM5

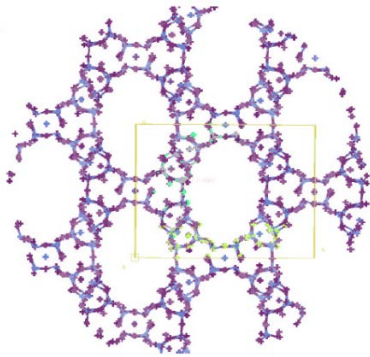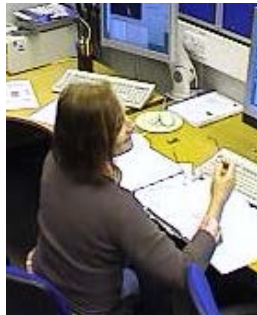

M Helliwell, J. R. Helliwell, V. Kaucic,  
N. Zabukovec Logar, S. J. Teat, J. E.  
Warren and E. J. Dodson (2010) Acta  
Cryst B66, 345

Madeleine Helliwell

$\lambda_3$  scaled to  $\lambda_5 = \text{Zn}$

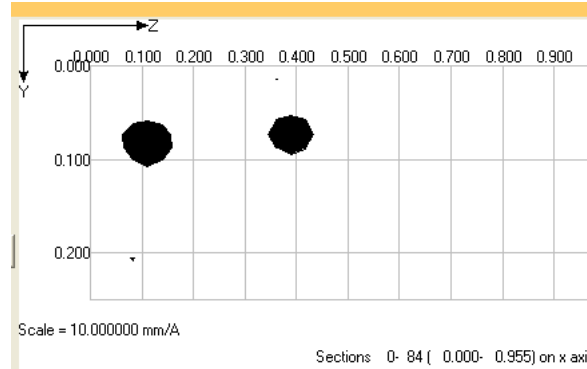

Delta anom  $\lambda_1 = \text{Zn}$

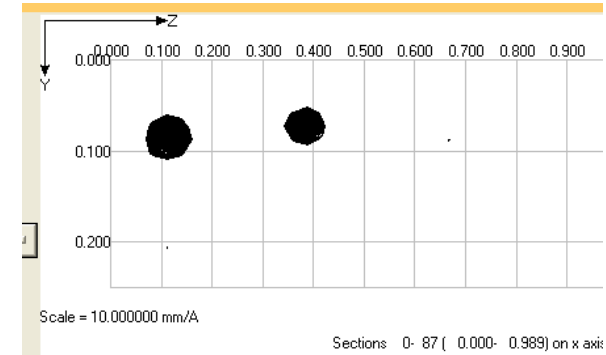

$\lambda_9$  scaled to  $\lambda_7 = \text{Ga} + \text{smaller Zn}$

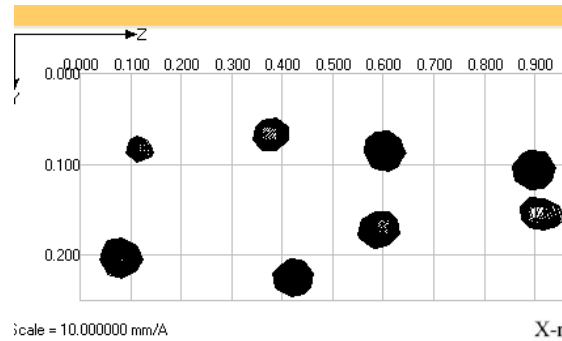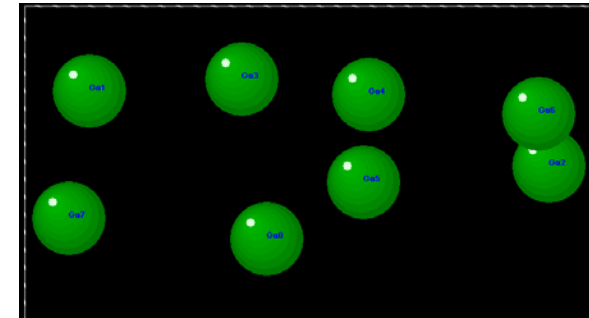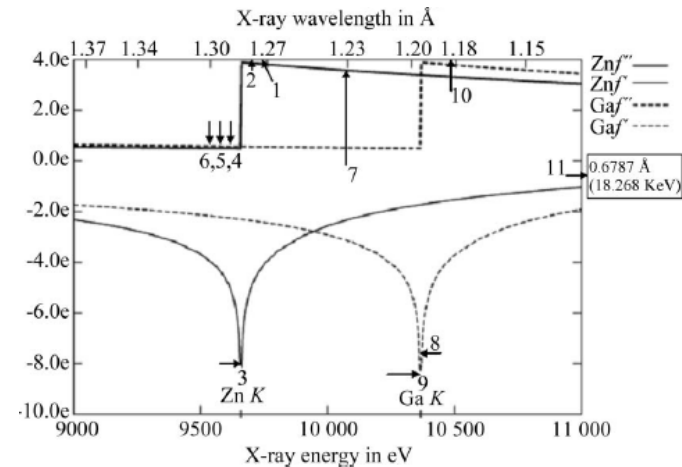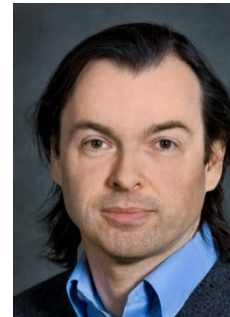

Simon Teat

**Public understanding of SR and structural  
Science: marine colouration in lobster shell!**

**Huge public interest and also from school children**

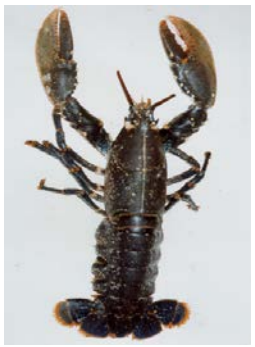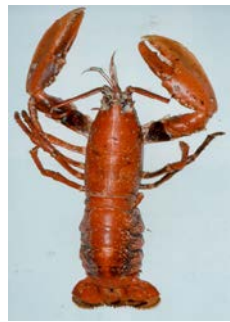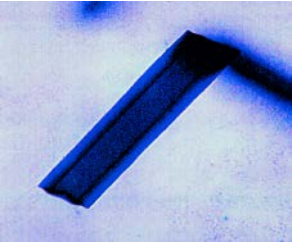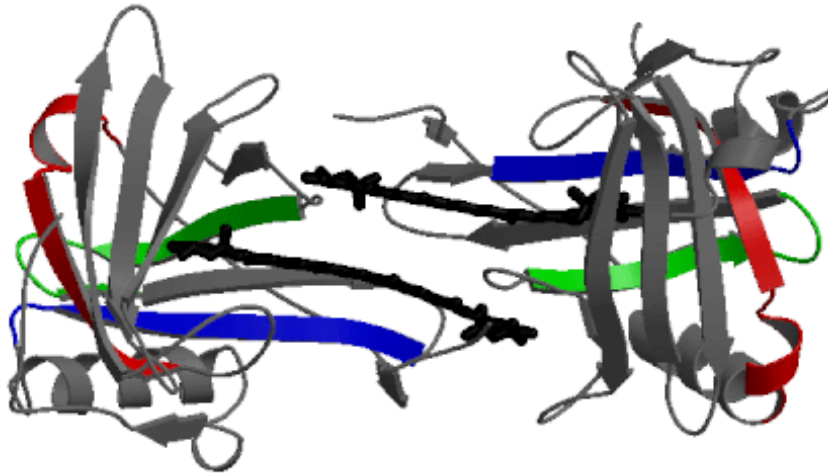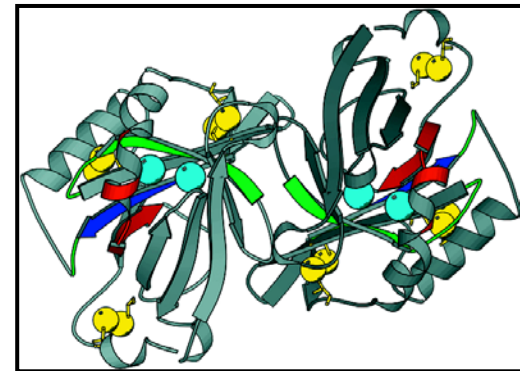

$\beta$ -Crustacyanin crystal

Apocrustacyanin A1  
 $\lambda$  2Å !!

Cianci et al (2002) PNAS USA 99, 9795  
*'The molecular basis of the coloration  
mechanism in lobster shell:  
 $\beta$ -crustacyanin at 3.2 Å resolution'*

Cianci et al (2001) Acta Cryst D57, 1219  
*"Structure of apocrustacyanin A1  
using softer X-rays"*

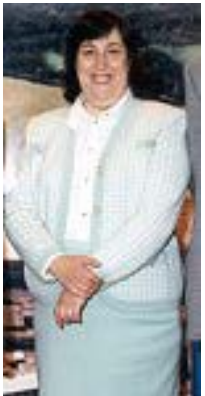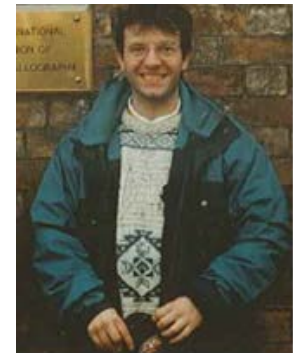

Mike Cianci

Naomi Chayen



***I have tried to show you that the field is very dynamic: whether considering new X-ray sources, beamline developments as well as our science and spin offs***



# *Acknowledgements*

- I heartily thank all the SR and neutron facilities for their collaboration
- I heartily thank my PhD students and PostDocs over the last 35 years
- Daresbury Laboratory & the Universities of York, Oxford, Keele & Manchester
- For specific assistance with slides I thank: Dr Pawel Grochulski (CLS), Dr Armin Wagner (DLS), Dr Gordon Leonard (ESRF), Dr Matthew Blakeley (Inst Laue Langevin) and Dr Colin Levy (Manchester Institute of Biotechnology).

MACROMOLECULAR  
CRYSTALLOGRAPHY  
with SYNCHROTRON  
RADIATION

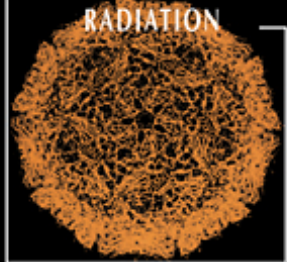

John R. Helliwell

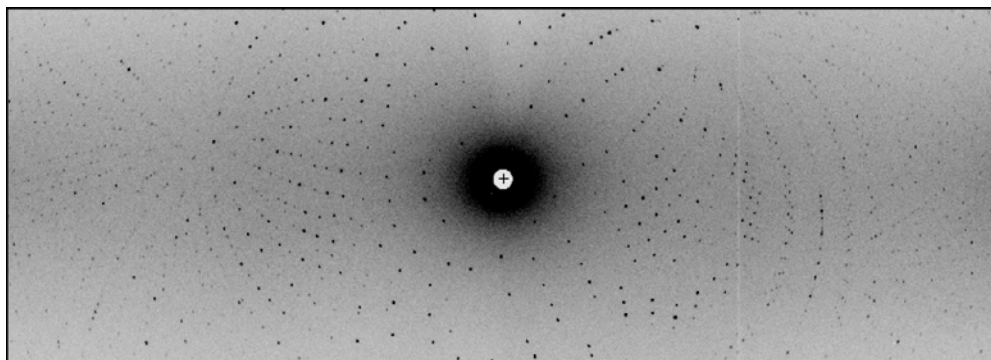

Time-resolved  
Diffraction

Edited by  
J. R. HELLIWELL and  
P. M. HENTZEPIS

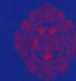

OXFORD SCIENCE PUBLICATIONS

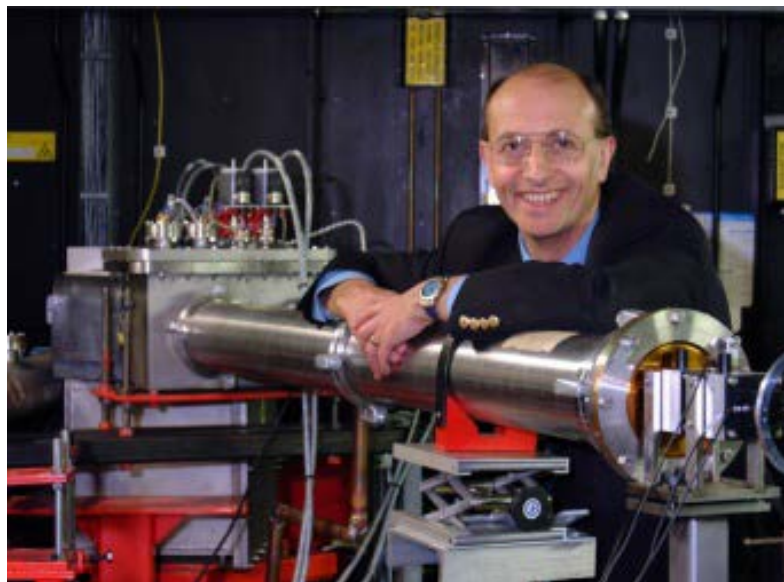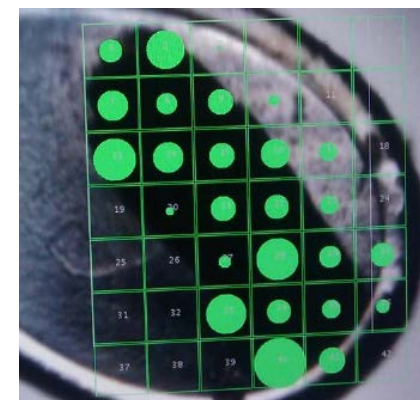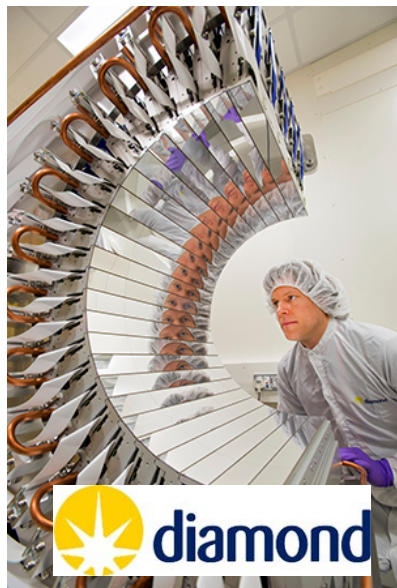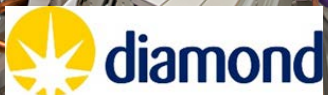

*Thank you*

ICG Monographs on Crystallography - 24

Macromolecular  
Crystallization and  
Crystal Perfection

NAOMI E. CHAYEN  
JOHN R. HELLIWELL  
EDWARD H. SNELL

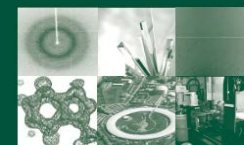

INTERNATIONAL UNION OF CRYSTALLOGRAPHY  
OXFORD SCIENCE PUBLICATIONS

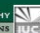

Supplement: m-02-00283-sup2.pdf [file m-02-00283-sup2.pdf]
